1 Identifying tissues implicated in Anorexia Nervosa using Transcriptomic Imputation

2

3 **Author List:**

4 Laura M. Huckins, PhD 1,2,3,4,5, Amanda Dobbyn, PhD 1,2,4, Whitney McFadden, MD 1,2,3,  
5 Douglas Ruderfer, PhD 6, Weiqing Wang, BSc 1,2, Eric Gamazon, PhD 6,7, Virpi Leppä, PhD 8,  
6 Roger Adan, PhD 9,10, Tetsuya Ando, MD, PhD 11, Jessica Baker, PhD 12, Andrew Bergen, PhD  
7 13, Wade Berrettini, MD, PhD 14, Andreas Birgegård, PhD 15,16, Claudette Boni, PhD 17, Vesna  
8 Boraska Perica, PhD 18, Harry Brandt, MD 19, Roland Burghardt, MD 20, Matteo Cassina, MD  
9 21, Carolyn Cesta, 22, Maurizio Clementi, MD 21, Joni Coleman, MSc 23, Roger Cone, PhD 24,  
10 Philippe Courtet, MD 25, Steven Crawford, MD 26, Scott Crow, MD 27, James Crowley, PhD  
11 28,29, Unna Danner, PhD 10, Oliver Davis, MSc, PhD 30, Martina de Zwaan, MD 31, George  
12 Dedoussis, PhD 32, Daniela Degortes, PhD 21, Janiece DeSocio, PhD, RN, PMHNP-BC 33,  
13 Danielle Dick, PhD 34, Dimitris Dikeos, MD 35, Monika Dmitrzak-Weglarz, PhD 36, Elisa  
14 Docampo, MD, PhD 37,38,39, Karin Egberts, MD 40, Stefan Ehrlich, MD 41,42, Geòrgia  
15 Escaramís, PhD 37,38,43, Tõnu Esko, PhD 44, Xavier Estivill, MD, PhD 45,37,38,43, Angela  
16 Favaro, MD, PhD 21, Fernando Fernández-Aranda, PhD, FAED 46, Manfred Fichter, MD, Dipl-  
17 Psych 47, Chris Finan, PhD 48, Krista Fischer, PhD 49, Manuel Föcker, MD 50,51, Lenka  
18 Foretova, MD, PhD 52, Monica Forzan, PhD 53, Christopher Franklin, PhD 48, Héléna Gaspar,  
19 PhD 23, Fragiskos Gonidakis, MD 54, Philip Gorwood, MD, PhD 55, Monica Gratacos, MD, PhD  
20 37,38,43, Sébastien Guillaume, MD, PhD 25, Yiran Guo, PhD 56, Hakon Hakonarson, MD, PhD  
21 56,57, Katherine Halmi, MD 58, Konstantinos Hatzikotoulas, MD, PhD 48, Joanna Hauser, MD,  
22 PhD 36, Johannes Hebebrand, MD 59, Sietske Helder, PhD 60,61, Judith Hendriks, BSc 62, Beate  
23 Herpertz-Dahlmann, MD 63, Wolfgang Herzog, MD 64, Christopher Hilliard, BS 65, Anke Hinney,  
24 PhD 59, James Hudson, MD, ScD 66,67, Julia Huemer, MD 68, Hartmut Imgart, MD 69, Hidetoshi  
25 Inoko, PhD 70, Susana Jiménez-Murcia, PhD 46, Craig Johnson, PhD 71, Jenny Jordan, PhD  
26 72,73, Anders Juréus, PhD 74, Gursharan Kalsi, PhD 23, Debora Kaminska, PhD 75, Allan Kaplan,  
27 MSc, MD, FRCP(C) 76, Jaakko Kaprio, MD, PhD 77, Leila Karhunen, PhD 78, Andreas Karwautz,  
28 MD, FAED 68, Martien Kas, PhD 79, Walter Kaye, MD 80, James Kennedy, MD, FRCP(C) 76,  
29 Martin Kennedy, PhD 72, Anna Keski-Rahkonen, MD, PhD, MPH 81, Kirsty Kiezebrink, BSc  
30 (Hons), PGDip, PhD, FHEA, RNutr 82, Youl-Ri Kim, MD, PhD 83, Kelly Klump, PhD 84, Gun Peggy

31 Knudsen, PhD 85, Bobby Koeleman, PhD 9, Doris Koubek, MD 68, Maria La Via, MD 65, Mikael  
32 Landén, MD, PhD 86, Robert Levitan, MD 76, Dong Li, PhD 56, Paul Lichtenstein, PhD 22, Lisa  
33 Lilienfeld, PhD 87, Jolanta Lissowska, PhD 88, Pierre Magistretti, PhD 89, Mario Maj, MD, PhD  
34 90, Katrin Mannik, PhD 91, Nicholas Martin, PhD 92, Sara McDevitt, MB, MD, MRCPsych,  
35 MMedED 93, Peter McGuffin, MD 94, Elisabeth Merl, MD 68, Andres Metspalu, PhD, MD 49,  
36 Ingrid Meulenbelt, PhD 95, Nadia Micali, MD, PhD 96, James Mitchell, MD 97, Karen Mitchell,  
37 PhD 98, Palmiero Monteleone, MD 99, Alessio Maria Monteleone, MD 90, Preben Mortensen,  
38 MD, DrMedSc 100, Melissa Munn-Chernoff, PhD 65, Benedetta Nacmias, PhD 101, Ida Nilsson,  
39 PhD 102,103, Claes Norring, PhD 104, Ioanna Ntalla, PhD 32, Julie O'Toole, MD 105, Jacques  
40 Pantel, PhD 106, Hana Papezova, MD, PhD 75, Richard Parker, 92, Raquel Rabionet, PhD 107,  
41 Anu Raevuori, MD, PhD 81, Andrzej Rajewski, MD, PhD 36, Nicolas Ramoz, PhD 108, N.William  
42 Rayner, PhD 48,109,110, Ted Reichborn-Kjennerud, MD 111, Valdo Ricca, MD 101, Stephan  
43 Ripke, MD, PhD 112, Franziska Ritschel, MSc 113, Marion Roberts, PhD 23,182, Alessandro  
44 Rotondo, MD 114, Filip Rybakowski, MD, PhD 115, Paolo Santonastaso, MD 21, André Scherag,  
45 PhD 116, Ulrike Schmidt, MD, PhD 23, Nicholas Schork, PhD 117, Alexandra Schosser, PhD 68,  
46 Jochen Seitz, MD 63, Lenka Slachtova, PhD 75, P. Eline Slagboom, PhD 95, Margarita Slof-Op 't  
47 Landt, PhD 118, Agnieszka Slopian, MD 119, Tosha Smith, PhD 65, Sandro Sorbi, MD 101, 120,  
48 Eric Strengman, BS 121, Michael Strober, PhD 122, Patrick Sullivan, MD, FRANZCP 28,29, Jin  
49 Szatkiewicz, PhD 65, Neonila Szeszenia-Dabrowska, MD, PhD 123, Ioanna Tachmazidou, PhD 48,  
50 Elena Tenconi, MD 21, Laura Thornton, PhD 65, Alfonso Tortorella, MD 90,124, Federica Tozzi,  
51 MD 125, Janet Treasure, PhD, FRCP, FRCPsych 23, Artemis Tsitsika, MD, PhD 126, Konstantinos  
52 Tziouvas, MD, MSc 127, Annemarie van Elburg, MD, PhD 128,129, Eric van Furth, PhD 130,  
53 Tracey Wade, PhD 131, Gudrun Wagner, Dr, MSc, DPO 68, Esther Walton, Dr. rer. nat., PhD  
54 132,133, Hunna Watson, PhD 134,135,136, D.Blake Woodside, MD 137, Shuyang Yao, MSc, BSc  
55 138, Zeynep Yilmaz, PhD 65, Eleftheria Zeggini, PhD 48, Stephanie Zerwas, PhD 65, Stephan  
56 Zipfel, MD 139, Alfredsson Lars, PhD 22, Andreassen Ole, MD, PhD 140,141, Harald Aschauer,  
57 MD 142, Jeffrey Barrett, PhD 143, Vladimir Bencko, MD, PhD 144, Laura Carlberg, MD 68, Sven  
58 Cichon, PhD 145, Sarah Cohen-Woods, PhD 146, Christian Dina, PhD 147, Bo Ding, PhD 148,  
59 Thomas Espeseth, PhD 140,141, James Floyd, PhD 149, Steven Gallinger, MD 76, Giovanni

60 Gambaro, MD, PhD 150, Ina Giegling, PhD 151, Stefan Herms, PhD 152, Vladimir Janout, PhD  
61 153, Antonio Julià, PhD 154, Lars Klareskog, MD 22, Stephanie Le Hellard, PhD 155, Marion  
62 Leboyer, MD, PhD 156, Astri J. Lundervold, PhD 157, Sara Marsal, MD, PhD 154, Morten  
63 Mattingsdal, PhD 158, Marie Navratilova, MUDr., PhD 52, Roel Ophoff, PhD 159, Aarno Palotie,  
64 MD, PhD 160,161,162,163,164, Dalila Pinto, PhD 165,166, Samuli Ripatti, PhD 81, Dan Rujescu,  
65 MD 151,167, Stephen Scherer, PhD, FRSC 168, Laura Scott, PhD 169, Robert Sladek, MD  
66 170,171, Nicole Soranzo, PhD 172,173,174, Lorraine Southam, BSc 48,110, Vidar Steen, MD,  
67 PhD 155, Wichmann H-Erich, PhD 175, Elisabeth Widen, MD, PhD 176, Bernie Devlin, PhD 177,  
68 Solveig K. Sieberts, PhD 178, Nancy Cox, PhD 179, Hae Kyung Im, PhD 180,179, Gerome Breen,  
69 PhD 23, Pamela Sklar, MD, PhD 1,5,2,181, Cynthia Bulik, PhD 28,29, Eli A. Stahl, PhD 1,5,  
70  
71 1 Pamela Sklar Division for Precision Psychiatry, Icahn School of Medicine at Mount Sinai, USA  
72 2 Department of Genetics and Genomics, Icahn School of Medicine at Mount Sinai, USA  
73 3 Department of Psychiatry, Icahn School of Medicine at Mount Sinai, USA  
74 4 Institute for Personalized Medicine, Icahn School of Medicine at Mount Sinai, USA  
75 5 Institute for Genomics and Multiscale Biology, Icahn School of Medicine at Mount Sinai, USA  
76 6 Vanderbilt University Medical Center, Nashville, TN, USA  
77 7 Section of Genetic Medicine, Department of Medicine, University of Chicago, Chicago, Illinois,  
78 USA  
79 8 CEDI – Centre for Eating Disorders Innovation, Department of Medical Epidemiology and  
80 Biostatistics (MEB), C8, Karolinska Institutet, Nobels väg 12A, 171 77 Solna, Sweden,  
81 9 University Medical Center Utrecht, Netherlands  
82 10 Altrecht Eating Disorders Rintveld, Netherlands  
83 11 National Institute of Mental Health, Japan  
84 12 University of North Carolina at Chapel Hill, UNC  
85 13 Biorealm Research, Culver City, CA, USA  
86 14 Perelman School of Medicine at the University of Pennsylvania, USA  
87 15 Centre for Psychiatry Research, Department of Clinical Neuroscience, Karolinska Institutet,  
88 Sweden

- 89 16 Stockholm Health Care Services, Stockholm County Council, Sweden
- 90 17 Centre of Psychiatry and Neuroscience, France
- 91 18 Wellcome Trust Sanger Institute, University of Split School of Medicine, UK
- 92 19 The Center for Eating Disorders at Sheppard Pratt, Baltimore, USA
- 93 20 Klinikum Frankfurt/Oder, Germany
- 94 21 University of Padova, Italy
- 95 22 Karolinska Institutet, Sweden
- 96 23 King's College London, UK
- 97 24 University of Michigan, USA
- 98 25 CHRU Montpellier, University of Montpellier, France
- 99 26 The Center for Eating Disorders at Sheppard Pratt, USA
- 100 27 University of Minnesota, USA
- 101 28 University of North Carolina at Chapel Hill, USA,
- 102 29 Karolinska Institutet, Sweden,
- 103 30 University of Bristol, UK
- 104 31 Hannover Medical School, Germany
- 105 32 Harokopio University, Greece
- 106 33 Seattle University College of Nursing, USA
- 107 34 Virginia Commonwealth University, USA
- 108 35 Athens University Medical School, Greece
- 109 36 Poznan University of Medical Sciences, Poland
- 110 37 The Barcelona Institute of Science and Technology, Spain
- 111 38 Universitat Pompeu Fabra, Spain
- 112 39 CIBER Epidemiología y Salud Pública, Spain
- 113 40 University Hospital of Würzburg, Germany
- 114 41 Division of Psychological and Social Medicine and Developmental Neurosciences, Faculty of
- 115 Medicine, TU Dresden, Germany, Germany
- 116 42 Eating Disorders Research and Treatment Center, Department of Child and Adolescent
- 117 Psychiatry, Faculty of Medicine, TU Dresden, Germany, Germany

- 118 43 Centro de Investigación Biomédica en Red en Epidemiología y Salud Pública, Spain  
119 44 University of Tartu, Broad Institute, Estonia  
120 45 Centre for Genomic Regulation (CRG), Spain  
121 46 University Hospital of Bellvitge-IDIBELL and CIBEROBN, University of Barcelona, Spain  
122 47 Ludwig-Maximilians-University Munich, Schön Klinik Roseneck, Germany  
123 48 Wellcome Trust Sanger Institute, UK  
124 49 University of Tartu, Estonia  
125 50 Department of Child and Adolescent Psychiatry, University Hospital Essen, Germany  
126 51 University of Duisburg-Essen, Essen, Germany  
127 52 Masaryk Memorial Cancer Institute, Czech Republic  
128 53 University Hospital of Padova, Italy  
129 54 National and Kapodistrian University of Athens, Greece  
130 55 INSERM U984, Sainte-Anne Hospital, University of Paris-Descartes, France  
131 56 Children's Hospital of Philadelphia, USA  
132 57 University of Pennsylvania, USA  
133 58 Weill Cornell Medical College, USA  
134 59 Department of Child and Adolescent Psychiatry, University Hospital Essen, University of  
135 Duisburg-Essen, Essen, Germany  
136 60 Zorg op Orde, Netherlands,  
137 61 King's College London, UK,  
138 62 University Utrecht, Netherlands  
139 63 RWTH Aachen, Germany  
140 64 Heidelberg University, Germany  
141 65 University of North Carolina at Chapel Hill, USA  
142 66 McLean Hospital, USA  
143 67 Harvard Medical School, USA  
144 68 Medical University of Vienna, Austria  
145 69 Parkland-Klinik, Germany  
146 70 Tokai University School of Medicine, Japan

- 147 71 Eating Recovery Center, USA
- 148 72 University of Otago, New Zealand
- 149 73 Canterbury District Health Board, New Zealand
- 150 74 Department of Medical Epidemiology and Biostatistics, Karolinska Institutet, Stockholm,
- 151 Sweden,
- 152 75 Charles University, Czech Republic
- 153 76 University of Toronto, Canada
- 154 77 University of Helsinki, National Institute for Health and Welfare, Finland
- 155 78 University of Eastern Finland, Finland
- 156 79 University of Groningen, University Medical Center Utrecht, Netherlands
- 157 80 University of California, San Diego, USA
- 158 81 University of Helsinki, Finland
- 159 82 University of Aberdeen, UK
- 160 83 Inje University, South Korea
- 161 84 Michigan State University, USA
- 162 85 Norwegian Institute of Public Health, Norway
- 163 86 Karolinska Institutet, Gothenburg University, Sweden
- 164 87 American School of Professional Psychology at Argosy University, Washington DC, USA
- 165 88 M. Sklodowska-Curie Cancer Center and Institute of Oncology, Poland
- 166 89 Brain Mind Institute, EPFL, Center for Psychiatric Neuroscience, Department of Psychiatry -
- 167 CHUV/UNIL, Switzerland
- 168 90 University of Campania "Luigi Vanvitelli", Naples
- 169 91 University of Tartu, University of Lausanne, Estonia
- 170 92 QIMR Berghofer Medical Research Institute, Australia
- 171 93 University College Cork, Health Service Executive South, Ireland
- 172 94 Kings College London, UK
- 173 95 Leiden University Medical Centre, Netherlands
- 174 96 University of Geneva, Switzerland
- 175 97 University of North Dakota School of Medicine and Health Sciences, USA

- 176 98 VA Boston Healthcare System, Boston University School of Medicine, USA  
177 99 University of Salerno, Italy  
178 100 Aarhus University, Denmark  
179 101 Department Neuroscience, Psychology, Drug Research and Child Health, University of  
180 Florence, Italy  
181 102 Department of Molecular Medicine and Surgery, Karolinska Institutet, Sweden  
182 103 Center for Molecular Medicine, Karolinska University Hospital, Sweden  
183 104 Centre for Psychiatry Research, Department of Clinical Neuroscience, Karolinska Institutet,  
184 & Stockholm Health Care Services, Stockholm County Council, Sweden  
185 105 Kartini Clinic, USA  
186 106 Centre de Psychiatrie et Neurosciences - Inserm U894, USA  
187 107 Centre for Genomic Regulation (CRG), The Barcelona Institute of Science and Technology,  
188 Universitat Pompeu Fabra, Centro de Investigación Biomédica en Red en Epidemiología y Salud  
189 Pública, Spain  
190 108 Centre de Psychiatrie et Neurosciences - Inserm U894, France  
191 109 Oxford Centre for Diabetes, Endocrinology and Metabolism, UK  
192 110 Wellcome Trust Centre for Human Genetics, UK  
193 111 Norwegian Institute of Public Health, University of Oslo, Norway  
194 112 Charité Universtätsmedizin Berlin,  
195 113 Division of Psychological and Social Medicine and Developmental Neurosciences, Faculty of  
196 Medicine, TU Dresden, Germany, Eating Disorders Research and Treatment Center, Department  
197 of Child and Adolescent Psychiatry, Faculty of Medicine, TU Dresden, Germany,  
198 114 University of Pisa, Italy  
199 115 Institute of Psychiatry and Neurology, University of Social Sciences and Humanities, Poland  
200 116 Jena University Hospital, Germany  
201 117 J. Craig Venter Institute, USA  
202 118 Rivierduinen Eating Disorders Ursula, Leiden University Medical Centre, Netherlands  
203 119 Uniwersytet Medyczny im. Karola Marcinkowskiego, Poland  
204 120 IRCSS Fondazione Don Gnocchi, Florence, Italy

- 205 121 Department of Pathology, University Medical Center Utrecht, The Netherlands,  
206 Netherlands
- 207 122 University of California at Los Angeles , USA
- 208 123 Nofer Institute of Occupational Medicine, Department of Environmental Epidemiology,  
209 Poland
- 210 124 University of Perugia, Italy
- 211 125 University of Cyprus, UK
- 212 126 University of Athens "P. & A. Kyriakou" Children's Hospital, Greece
- 213 127 "P. & A. Kyriakou" Children's Hospital, PICU, Greece
- 214 128 Center for Eating Disorders Rintveld, Netherlands
- 215 129 University of Utrecht, Netherlands
- 216 130 Rivierduinen Eating Disorders Ursula, Leiden University Medical Center, Netherlands
- 217 131 Flinders University, Australia
- 218 132 Division of Psychological and Social Medicine and Developmental Neurosciences, Faculty of  
219 Medicine, TU Dresden, Germany,
- 220 133 Eating Disorders Research and Treatment Center, Department of Child and Adolescent  
221 Psychiatry, Faculty of Medicine, TU Dresden, Germany,
- 222 134 University of North Carolina at Chapel Hill,
- 223 135 School of Paediatrics and Child Health, Faculty of Medicine, Dentistry, and Life Sciences,  
224 The University of Western Australia, Australia,
- 225 136 School of Psychology and Speech Pathology, Faculty of Health Sciences, Curtin University,  
226 Australia,
- 227 137 University of Toronto, Toronto General Hospital, Canada
- 228 138 Karolinska Institutet, Sweden
- 229 139 University Medical Hospital Tuebingen, Germany
- 230 140 University of Oslo, Norway
- 231 141 Oslo University Hospital, Norway
- 232 142 Biopsychosocial Corporation, Austria
- 233 143 Sanger Institute, UK



- 234 144 Charles University, First Faculty of Medicine, Institute of Hygiene and Epidemiology, Czech  
235 Republic
- 236 145 University Hospital Basel, Switzerland
- 237 146 Finders University, AU
- 238 147 University of Nantes, France
- 239 148 University of California at San Diego, USA
- 240 149 Wellcome Trust Sanger Institute, Genomics PLC, UK
- 241 150 Columbus-Gemelli University Hospital, Italy
- 242 151 Martin Luther University of Halle-Wittenberg, Germany
- 243 152 University of Basel, Switzerland
- 244 153 Ostrava University, Czech Republic
- 245 154 Vall d'Hebron Hospital Research Institute, Spain
- 246 155 University of Bergen, Haukeland University Hospital, Norway
- 247 156 Université Paris-Est-Créteil (UPEC), France
- 248 157 University of Bergen, K. G. Jebsen Center for Neuropsychiatric Disorders , Noway
- 249 158 Oslo University, Norway
- 250 159 University of California Los Angeles, University Medical Center Utrecht, Netherlands
- 251 160 Massachusetts General Hospital, USA
- 252 161 Broad Institute, USA
- 253 162 Massachusetts Institute of Technology, USA
- 254 163 Harvard, USA
- 255 164 Institute for Molecular Medicine, USA
- 256 165 Department of Genetics and Genomics, Icahn School of Medicine at Mount Sinai, USA,
- 257 166 Department of Psychiatry, Icahn School of Medicine at Mount Sinai, USA,
- 258 167 Ludwig-Maximilians-University Munich, Germany
- 259 168 The Hospital for Sick Children, University of Toronto, Canada
- 260 169 Department of Biostatistics, University of Michigan,
- 261 170 McGill University, Canada
- 262 171 Génome Québec Innovation Centre, Canada

263 172 Human Genetics, Wellcome Trust Sanger Institute, Genome Campus, Hinxton, CB10 1HH,  
264 UK  
265 173 Department of Haematology, University of Cambridge, Hills Rd, Cambridge CB2 0AH, UK  
266 174 The National Institute for Health Research Blood and Transplant Unit (NIHR BTRU) in Donor  
267 Health and Genomics at the University of Cambridge, UK  
268 175 Helmholtz Centre Munich - German Research Center for Environmental Health, Germany  
269 176 Institute for Molecular Medicine, Finland  
270 177 Department of Psychiatry, University of Pittsburgh, Pittsburgh, PA, USA  
271 178 Systems Biology, Sage Bionetworks, Seattle, WA, USA  
272 179 Section of Genetic Medicine, Department of Medicine, University of Chicago, Chicago,  
273 Illinois, USA,  
274 180 Vanderbilt University Medical Center, Nashville, TN,  
275 181 Friedman Brain Institute, Icahn School of Medicine at Mount Sinai, USA  
276 182 University of Auckland, New Zealand

277 **Abstract**

278 Anorexia nervosa (AN) is a complex and serious eating disorder, occurring in ~1% of individuals.  
279 Despite having the highest mortality rate of any psychiatric disorder, little is known about the  
280 aetiology of AN, and few effective treatments exist.

281  
282 Global efforts to collect large sample sizes of individuals with AN have been highly successful,  
283 and a recent study consequently identified the first genome-wide significant locus involved in  
284 AN. This result, coupled with other recent studies and epidemiological evidence, suggest that  
285 previous characterizations of AN as a purely psychiatric disorder are over-simplified. Rather,  
286 both neurological and metabolic pathways may also be involved.

287  
288 In order to elucidate more of the system-specific aetiology of AN, we applied transcriptomic  
289 imputation methods to 3,495 cases and 10,982 controls, collected by the Eating Disorders  
290 Working Group of the Psychiatric Genomics Consortium (PGC-ED). Transcriptomic Imputation  
291 (TI) methods approaches use machine-learning methods to impute tissue-specific gene  
292 expression from large genotype data using curated eQTL reference panels. These offer an  
293 exciting opportunity to compare gene associations across neurological and metabolic tissues.  
294 Here, we applied CommonMind Consortium (CMC) and GTEx-derived gene expression  
295 prediction models for 13 brain tissues and 12 tissues with potential metabolic involvement  
296 (adipose, adrenal gland, 2 colon, 3 esophagus, liver, pancreas, small intestine, spleen, stomach).

297  
298 We identified 35 significant gene-tissue associations within the large chromosome 12 region  
299 described in the recent PGC-ED GWAS. We applied forward stepwise conditional analyses and  
300 FINEMAP to associations within this locus to identify putatively causal signals. We identified  
301 four independently associated genes; *RPS26*, *C12orf49*, *SUOX*, and *RDH16*. We also identified  
302 two further genome-wide significant gene-tissue associations, both in brain tissues; *REEP5*, in  
303 the dorso-lateral pre-frontal cortex (DLPFC;  $p=8.52 \times 10^{-07}$ ), and *CUL3*, in the caudate basal  
304 ganglia ( $p=1.8 \times 10^{-06}$ ). These genes are significantly enriched for associations with  
305 anthropometric phenotypes in the UK BioBank, as well as multiple psychiatric, addiction, and

306 appetite/satiety pathways. Our results support a model of AN risk influenced by both metabolic  
307 and psychiatric factors.

## 308 **Introduction**

309 Anorexia nervosa (AN) is a serious neuropsychiatric disorder presenting with low body weight, a  
310 fear of weight gain or behaviours that interfere with weight gain, and a lack of recognition of  
311 the seriousness of the illness. AN has the highest mortality rate of any psychiatric disorder<sup>1</sup>, and  
312 ranks among the leading cause of disability in young women worldwide. Despite this, little is  
313 known about the biological mechanisms underlying AN development, and few effective  
314 therapies and medications are available.

315  
316 Findings from genetic and epidemiological research have encouraged broadening our  
317 conceptualization of the aetiology of AN beyond purely psychiatric causes to incorporate  
318 metabolic and other somatic factors in risk models. Recently, genome-wide association studies  
319 have revealed the first significantly associated genomic locus for anorexia nervosa<sup>2</sup>, as well as a  
320 number of promising sub-threshold associations<sup>3-5</sup>, and intriguing pathway associations. Results  
321 have implicated genes with both psychiatric and metabolic relevance, while polygenic risk score  
322 analyses and LD-Score approaches have revealed significant genetic overlap with psychiatric,  
323 metabolic and autoimmune diseases, as well as anthropometric traits.

324  
325 The research findings underscore clinical observations as individuals with AN have an uncanny  
326 ability to reach and maintain extraordinarily low body mass indices (BMI) and after successful  
327 renourishment, their bodies often quickly revert to what may be an abnormally low set point<sup>2</sup>.  
328 Other observations include that individuals with AN tend to find eating aversive, and feelings of  
329 fullness unpleasant; dieting, restricting, and binge-purge behaviours tend to alleviate  
330 uncomfortable or painful associations with fullness in these individuals and reduce anxiety<sup>6</sup>.  
331 Although aversion to fullness and low appetite could be driven by dysfunction of  
332 neurobiological satiety pathways or altered levels of orexigenic hormones<sup>7</sup>, it is also possible  
333 that specific metabolic or gastric dysfunction enables and perpetuates dieting behaviours.

334  
335 Transcriptomic Imputation (TI) provides an opportunity to test the involvement of metabolic,  
336 endocrine, adipose, and gastrointestinal (GI) tissues, as well as brain tissues, in the

337 development of AN. These approaches leverage well curated eQTL panels to create predictors  
338 of genetically regulated gene expression (GREX)<sup>8-10</sup>. These predictors may be applied to large  
339 groups of genotyped individuals, to identify case-control associations with predicted differential  
340 gene expression. This approach circumvents many of the complications inherent in traditional  
341 transcriptomic analysis; for example, the need to collect large number of inaccessible tissues,  
342 which is particularly complicated in studies of early-onset psychiatric disorders<sup>11</sup>. Further, the  
343 prediction of genetically-regulated gene expression means that there is no ambiguity in  
344 direction of effect; unlike in RNA-seq studies, where changes in gene expression may result  
345 from medication, diet, exercise, or environmental exposures, genetically regulated gene  
346 expression necessarily precedes disease onset<sup>8</sup>.

347  
348 An intriguing aspect of transcriptomic imputation is the opportunity to calculate predicted gene  
349 expression in a tissue-specific manner, and to use this to further inform our understanding of  
350 disease aetiology. In this study, we used gene expression predictor models for 13 brain regions  
351 (derived from CMC<sup>12,13</sup> and GTEX<sup>8,14</sup> data), as well as fifteen gastrointestinal, endocrine, and  
352 adipose tissues, and compared patterns of gene expression changes between cases and  
353 controls. We identified 37 significant gene-tissue associations, constituting eleven independent  
354 signals. These genes together explained 2.38% of the phenotypic variance in our study,  
355 including substantial proportions of variance explained by genes in brain tissues (51.5%),  
356 gastrointestinal tissues (16.01%), endocrine (18.6%), and adipose tissues (13.9%), supporting  
357 our theory of both psychiatric and metabolic contributions to AN risk. We identify genes with  
358 intriguing patterns of association with anthropometric traits; for example, seven of our gene-  
359 tissue associations are also significantly associated with BMI, weight, and waist circumference  
360 in the UK BioBank.

361

## 362 **Methods**

### 363 **Samples**

364 Genotype data were obtained from the PGC-ED collection. These data included 3,495 cases and  
365 10,982 ancestry-matched controls<sup>2</sup>. Detailed diagnostic criteria used are described in the PGC-  
366 ED GWAS of these data<sup>2</sup>. Briefly, cases include individuals with lifetime diagnoses of either AN  
367 (including both binge-purge and restrictive subtypes) or “eating disorder not other specified  
368 (EDNOS)”, AN subtype. A small number of individuals with bulimia nervosa diagnoses were also  
369 included if they also had histories of AN. Amenorrhoea was not required for diagnosis, as it  
370 does not increase diagnostic specificity<sup>15-17</sup>. Exclusion criteria included schizophrenia,  
371 intellectual disability, and medical and neurological conditions which may cause weight loss.

372

### 373 **Transcriptomic Imputation**

374 We imputed genetically regulated gene expression (GREX) using the CommonMind Consortium  
375 derived Dorso-lateral pre-frontal cortex (CMC DLPFC) predictor database<sup>12</sup>, as well as GTeX-  
376 derived predictor databases including 12 brain regions, four endocrine tissue, eight  
377 gastrointestinal/digestive tissues, and subcutaneous adipose tissue<sup>8,14</sup> (Table 1). We imputed  
378 GREX in all cohorts for which we had access to raw data using PrediXcan<sup>8</sup>.

379

380 We tested for association between GREX and case-control status in each cohort separately,  
381 using a standard linear regression test in R. We included ten principal components as covariates  
382 to correct for population stratification. Principal components were calculated from genotype  
383 data. Raw genotype-based and summary-statistics based cohorts were meta-analysed using an  
384 odds-ratio based approach in METAL<sup>18</sup>.

385

### 386 **Establishing a threshold for genome-wide significance**

387 We applied two significance thresholds to our data. First, we applied a threshold for each  
388 tissue, correcting for the number of genes tested within that tissue (Table 1). Second, we  
389 applied a stricter, overall threshold, correcting for all genes tested across all tissues  
390 simultaneously (234,896 tests in total,  $p=2.31 \times 10^{-7}$ ).

391 GREX is highly correlated across tissues<sup>14,19</sup>, and consequently the tests across different tissues  
392 are not independent. A Bonferroni correction may therefore be overly conservative, and under-  
393 estimate the true degree of association in this study.

394

### 395 **Identifying independent associations**

396 We identified a number of genomic regions with multiple associations, as well as genes with  
397 significant associations across multiple tissues. In particular, we identified a very large number  
398 of gene-tissue associations (35 significant gene-tissue associations), in the same chromosome  
399 12 locus identified in a recent GWAS by the PGC-ED group<sup>20</sup>.

400

401 We applied two methods to identified independent signals in these complex genomic regions.  
402 First, in regions with a small number of associated gene-tissue pairs (<5), we used “CoCo”, an  
403 extension to GCTA-CoJo<sup>21</sup>. Briefly, CoCo applies the same stepwise forward conditional analysis  
404 as in GCTA-CoJo, but allows specification of a custom linkage disequilibrium (LD) or correlation  
405 matrix instead of obtaining LD from a reference panel. Here, we calculated a GREX correlation  
406 matrix used this as the correlation matrix input to CoCo.

407

408 We used FINEMAP<sup>22</sup>, a shotgun stochastic search algorithm which identifies and ranks plausible  
409 causal configurations for a region, to disentangle the complex gene-tissue association patterns  
410 on chromosome 12. As for CoCo, we substituted a GREX correlation matrix in place of the  
411 standard LD-matrix input file. We constructed a 95% credible set from probable configurations  
412 specified by FINEMAP in order to identify significant gene-tissue associations within the region.

413

414 Additionally, we visually inspected patterns of correlation among the 35 gene-tissue  
415 associations in the chr12 locus using the ‘heatmap.2’ function in the ‘gplots’ R package<sup>23</sup>, and  
416 identified distinct clusters of GREX within this heatmap using a dendrogram cut at height 4.

417

418

419



## 420 **Proportion of variance explained by tissue**

421 We calculated the proportion of phenotypic variance in our study jointly explained by all genes  
422 reaching  $p < 1 \times 10^{-04}$  in our analysis. We corrected for ten principal components and study  
423 variables using a nested model.

424  
425 We divided gene-tissue associations into four categories; brain, endocrine,  
426 gastrointestinal/digestive, and subcutaneous adipose tissue. We used a series of nested models  
427 to calculate the variance explained by gene-tissue associations for each category. For example,  
428 the amount of variance explained by adipose-gene associations was calculated as the difference  
429 between the variance explained by all genes, and the variance explained by all genes except  
430 those associated in adipose tissue (eqn 1).

431

432 Equation 1: Nested model to calculate proportion of variance explained by adipose tissue

$$\text{Var}_{\text{Adipose}} = \text{Var}_{\text{All genes}} - \text{Var}_{\text{All genes except adipose}}.$$

433

## 434 **UK BioBank analysis**

435 We obtained publicly available GWAS summary statistics for the UK BioBank sample<sup>24,25</sup>. We  
436 analyzed summary statistics relating to three anthropometric traits; BMI (336,107 individuals),  
437 weight (in kg; 336,227 individuals), and waist circumference (in cm; 336,639 individuals). We  
438 obtained distributions of each trait from the UK BioBank search portal<sup>26</sup> (Suppl. Table 1).

439

440 Descriptions of phenotype curation, quality control, and association models used for the UK  
441 BioBank sample are available elsewhere<sup>25</sup>. Briefly, quantitative traits within the sample were  
442 normalized using a rank-based inverse normal transform (INRT) prior to analysis, and analysis  
443 was carried out using a linear regression. Beta values from these associations correspond not to  
444 the 'unit' of the original trait (e.g., cm or kg), but to the 'unit' of the INRT, i.e., the standard  
445 deviation of the original trait distribution. We confirmed this by simulating distributions  
446 matching the UK Biobank traits in R, and performing an INRT on each trait.

447

448 We used MetaXcan<sup>27</sup>, a summary statistic based software analogous to PrediXcan, to compute  
449 gene-tissue associations for genes with  $p < 1 \times 10^{-04}$  in our prediXcan PGC-ED analysis. In order to  
450 compare association statistics between our PGC-ED and UK BioBank studies, we normalized  
451 betas to account for the variance of a gene's GREX within each study.

452

### 453 **Pathway Analysis**

454 Pathway analysis was carried out using an adaptation to MAGMA<sup>28</sup>. We manually assigned  
455 prediXcan genic p-values to genes in order to carry out only the gene-set enrichment analysis in  
456 MAGMA. We used Bonferroni-corrected prediXcan p-values as input for our MAGMA analyses,  
457 in three stages; first, a Bonferroni-correction for the overall best p-value for each gene across  
458 tissues; second, for the best p-value across brain regions; third, for the best p-value across non-  
459 brain tissues.

460

461 We carried out two sets of pathway analysis. First, we tested a subset of pathways for which we  
462 had prior hypotheses of involvement with psychiatric disorders<sup>29,30</sup>, as well as genesets related  
463 to orexigenic hormones, hunger, and satiety. Second, we carried out an agnostic pathway  
464 enrichment test including ~8,500 pathways obtained from publicly available databases,  
465 including KEGG<sup>31,32</sup>, GO<sup>33</sup>, REACTOME<sup>34</sup>, PANTHER<sup>35,36</sup>, BIOCARTA<sup>37</sup>, and MGI<sup>38</sup>. We included  
466 only gene sets with at least 10 genes. Gene set enrichment results from the “competitive”  
467 MAGMA analysis were used, and an FDR-correction applied within each stratum of our analysis.

468

469

470

## 471 Results

### 472 Association Tests

473 We calculated predicted gene expression for thirteen brain regions, four endocrine tissues,  
474 eight gastrointestinal and digestive tissue, and subcutaneous adipose tissue (derived from CMC  
475 and GTEx data<sup>8,14,19,39</sup>) in 3,495 cases and 10,982 controls from the PGC-ED consortium, and  
476 tested for association between predicted gene expression (GREX) and case-control status.

477  
478 We identified 37 significant gene-tissue associations, and a further 22 sub-threshold  
479 associations ( $p < 1 \times 10^{-04}$ ; Suppl. Table 2). The majority of the significant associations (35/37)  
480 correspond to the only known genome-wide significant locus for AN<sup>20</sup>. We used FINEMAP<sup>22</sup> to  
481 identify independent signals within this region. We identified 12 likely gene-tissue associations  
482 within this region, including four unique genes; *SUOX*, *RPS26*, *RDH16*, and *C12orf49* (Suppl.  
483 Table 3). Visual inspection (Suppl. Figure 1) and hierarchical clustering (Suppl. Figure 2) of GREX  
484 correlation patterns within this region indicate three distinct groups of associated genes, and  
485 follow our FINEMAP results closely.

486  
487 We identified two additional genome-wide significant gene-tissue associations (Table 2). First, a  
488 region on chromosome two with three gene-tissue associations; increased expression of *CUL3*  
489 in the caudate basal ganglia ( $p = 1.86 \times 10^{-06}$ ), and increased expression of *WDFY1* and *FAM124B*,  
490 in adipose tissue ( $p = 6.11 \times 10^{-05}$ ,  $6.73 \times 10^{-05}$ , respectively). We applied a stepwise forward  
491 conditional analysis in CoCo (following GCTA-COJO), using GREX correlations for all three genes  
492 (Suppl. Table 4). Neither adipose tissue association remained significant after conditioning on  
493 *CUL3*-Caudate ( $p = 0.042$ ,  $0.25$ , respectively). Second, we identified decreased expression of  
494 *REEP5* in the DLPFC ( $p = 8.34 \times 10^{-07}$ ), and in the adrenal gland ( $p = 6.68 \times 10^{-05}$ ); conditioning *REEP5*-  
495 adrenal on *REEP5*-DLPFC completely ameliorates the signal ( $p = 0.085$ ).

496  
497 Additionally, we identified 22 sub-threshold associations ( $p < 1 \times 10^{-04}$ ), including 17 independent  
498 associations after stepwise conditional analysis (Table 2). In particular, we identified two genes  
499 on chromosome 10 with decreased expression in the small intestine and colon (*MGMT*-small

500 intestine, *MGMT*-pituitary, and *FOXI2*-colon), and two genes with increased brain expression on  
501 chromosome 17 (Supplementary table 2; *YWHAE*-hypothalamus, *NTN1*-nucleus accumbens).

502

### 503 **Comparing Tissue types**

504 Jointly, the genetically regulated gene expression (GREX) of our 28 gene-tissue associations  
505 ( $p < 1 \times 10^{-04}$ ) explain 2.38% of the phenotypic variance in our study. The majority of this variance  
506 (51.5%) was explained by brain-gene associations, followed by endocrine (18.6%),  
507 gastrointestinal/digestive (16.01%), and adipose tissues (13.9%).

508

### 509 **Associations with anthropometry**

510 We used publicly available GWAS summary statistics from the UK BioBank to test whether our  
511 AN associated genes were associated with anthropometric phenotypes such as BMI, weight,  
512 and waist circumference. We used a summary-statistics based approach analogous to  
513 *predixcan*<sup>40</sup> (“MetaXcan”) to identify gene-tissue associations across all three traits, for all  
514 genes reaching  $p < 1 \times 10^{-04}$  in our analysis.

515

516 Three genes within our chromosome twelve locus were significantly associated with at least  
517 one anthropometric phenotype in the UK BioBank sample (Table 3). The direction of effect was  
518 epidemiologically consistent with our *predixcan* analysis across all genes. For example,  
519 increased expression of *SUOX* in the colon, esophagus and spleen results in increased BMI  
520 ( $\sim 0.04$  BMI units/unit of gene expression;  $p < 1.28 \times 10^{-07}$ ), increased weight ( $\sim 0.135$ kg/unit of  
521 gene expression;  $p < 5.8 \times 10^{-08}$ ) in the UK BioBank, and decreased risk of AN in PGC-ED  
522 ( $OR = 0.98$ /unit of gene expression;  $p < 5 \times 10^{-07}$ ) (Figure 2A). Similarly, increased expression of  
523 *RPS26* and *RDH16* across multiple tissues is associated with increased AN risk, decreased BMI,  
524 decreased waist circumference, and decreased weight (Figure 2B).

525

526 Increased expression of *REEP5* is associated with increased weight ( $p < 2 \times 10^{-08}$ ) and decreased  
527 AN risk. Three sub-threshold AN genes (*BARX1*, *MGMT*, *TRIM38*) are also associated with BMI  
528 ( $p < 2 \times 10^{-13}$ ), weight ( $p < 2 \times 10^{-07}$ ), and waist circumference ( $p = 1.35 \times 10^{-08}$ ), again with highly

529 significant concordance of direction of effect between studies. Three sub-threshold associated  
530 genes, *BARX1*, *MGMT*, *TRIM38*, also follow this pattern of association.

531

532 This degree of shared signal and concordance of direction of effect is highly unlikely to occur by  
533 chance (binomial test  $p=2.39 \times 10^{-270}$ ). Interestingly, of the seven genes within our study that are  
534 associated with BMI, weight, and waist circumference within the UK BioBank, six are associated  
535 with AN in gastrointestinal tissues. The only brain-tissue based associated gene, *REEP5*, is an  
536 olfactory gene with a potential role in taste and appetite. Although it is difficult to draw firm  
537 conclusions given the small set of genes tested and the limited sample size of our study, these  
538 results suggest that gene expression changes in metabolic tissues are more likely to have  
539 general relevance for anthropometry and weight maintenance.

540

#### 541 **Pathway analysis**

542 We performed pathway analyses on our AN prediXcan results across (1) all tissues, (2), brain  
543 tissues, and (3) all non-brain tissues. For each set of results, we tested 174 gene sets with prior  
544 hypotheses for involvement in psychiatric disorders, and ~8,500 pathways obtained from  
545 publicly available databases.

546

547 Using the best p-value across all tissues, we identified 17 significantly enriched pathways (fdr-  
548 corrected  $p$ -value $<0.05$ ; Table 4). These include multiple calcium-gated voltage channel  
549 pathways ( $p<0.002$ ), axon guidance ( $p=1.07 \times 10^{-04}$ ), Wnt signalling ( $9.93 \times 10^{-04}$ ), the post-  
550 synaptic density (0.003), targets of the FMRP protein<sup>41-45</sup> ( $p=0.003$ ), as well as gene sets  
551 corresponding to neurological disease such as Alzheimer's, Huntington's, and Prion Disease  
552 ( $p<0.007$ ). We also noted enrichment of a pathway related to circadian entrainment  
553 ( $p=0.0013$ ).

554

555 Interestingly, genes involved in synthesis secretion and deacylation of ghrelin were significantly  
556 enriched within our results ( $p=0.0011$ ). Examining individual genes within this pathway  
557 indicates that no single gene is driving the association; rather, the pathway includes multiple

558 sub-threshold associations across *KLF4*, *BCHE*, *IGF1*, *SPCS2*, *ACHE*, *PCKS1*, and *SPSC3*. Taken  
559 together, these associations indicate lower baseline ghrelin expression in individuals with AN  
560 than in controls. For example, AN cases have lower GREX of *KLF4*, *SPCS2* and *SPCS3*, all of which  
561 stimulate ghrelin secretion<sup>46</sup>. AN cases also have increased expression of *ACHE*, *IGF1*, *PCKS1*,  
562 and *BCHE*, which inhibit ghrelin expression<sup>47-49</sup>. We also noted that GREX of ghrelin (GHRL) was  
563 lower in AN cases than controls across 11/12 tissues tested.

564  
565 Using exclusively brain-gene association statistics as an input to our MAGMA analysis resulted  
566 in 51 significantly enriched pathways. 35/51 pathways were from the hypothesis-driven test;  
567 these included circadian entrainment ( $p=2.6 \times 10^{-04}$ ), addictive behaviors (nicotine, alcohol,  
568 cocaine, and morphine dependence,  $p<0.0045$ ), calcium-gated voltage channels, and a large  
569 number of pathways related to processes in the post-synaptic density (Table 4), in line with  
570 pathway results from other psychiatric disorders<sup>10,30,50,51</sup>. A further 25 significantly enriched  
571 pathways were identified in the agnostic analysis, including further evidence of circadian  
572 entrainment ( $p=1.39 \times 10^{-06}$ ), long-term potentiation ( $p=4.44 \times 10^{-06}$ ), as well as multiple pathways  
573 implicating ear and neuronal system development in mice ( $p<1.2 \times 10^{-04}$ ). We noted enrichment  
574 in cyclic-AMP metabolism pathways ( $p<9.3 \times 10^{-05}$ ). This pathway includes dopamine receptor  
575 gene *DRD1* ( $p=8.85 \times 10^{-05}$ ), and *DRD5* ( $p=3.5 \times 10^{-04}$ ), two receptors which are part of the  
576 dopaminergic pathways affected by ghrelin in the VTA and nucleus accumbens<sup>52,53</sup>, as well as  
577 *GCG* (Glucagon;  $p=1.3 \times 10^{-03}$ ), and *APOE* ( $p=1.0 \times 10^{-03}$ ) which is associated with risk for  
578 Alzheimer's disease. CREB phosphorylation through activation of CaMKII pathway was enriched  
579 in our results ( $p=5.25 \times 10^{-05}$ ). This pathway includes *AKAP9* ( $p=2.1 \times 10^{-04}$ ), which regulates levels  
580 of cAMP activity in the brain, and co-localizes with NMDA receptor NR1 which in certain brain  
581 regions is involved in appetite and weight regulation<sup>54-56</sup>, as well as *GRIN2B* ( $p=5.1 \times 10^{-04}$ ), which  
582 is associated with neurite outgrowth and risky decision making<sup>57,58</sup>.

583  
584 Excluding brain-gene associations statistics from our pathway analysis results in only one  
585 subthreshold association ( $p=3.2 \times 10^{-04}$ ; *fdr*-corrected *p*-value 0.06) in our hypothesis-driven  
586 pathway analysis, concerning circadian rhythms (albeit through a different pathway than

587 identified in the brain-only analysis). Our agnostic pathway analysis identified only one  
588 significant association, with hyaluronic acid binding ( $p=2.32 \times 10^{-08}$ ).

589

590

591

592

593

594

595

596

## 597 Discussion

598 AN is a complex and serious neuropsychiatric disorder, with one of the highest mortality rates  
599 of any psychiatric disorder. As our research into the aetiology of AN develops and grows, we  
600 identify increasing levels of complexity and heterogeneity; for example, recent GWAS studies,  
601 LDscore analysis, and epidemiological evidence indicates both psychiatric and metabolic risk  
602 factors for the disorder.

603  
604 Here, we used gene expression prediction models for brain, gastrointestinal/digestive,  
605 endocrine, and adipose tissues to predict genetically regulated gene expression (GREX) in 3,495  
606 individuals with anorexia nervosa (AN) and 10,982 controls. We identified 12 independent  
607 gene-tissue associations reaching tissue-specific significance, the majority of which lie in the  
608 same chromosome 12 locus identified in a recent AN GWAS<sup>20</sup>. In line with our hypothesis of  
609 both psychiatric and metabolic risk having a role in AN, we identified genes with differential  
610 expression in endocrine and gastrointestinal/digestive tissues, as well as in brain.

611  
612 We calculated the phenotypic variance explained by the genetically regulated expression of  
613 these 28 genes, and used a nested model to partition the variance according to tissue type.  
614 Jointly, these explain 2.38% of the phenotypic variance in our study. The majority of this  
615 variance (51.5%) was explained by brain-gene associations, followed by endocrine (18.6%),  
616 gastrointestinal/digestive (16.01%), and adipose tissues (13.9%). The proportion of variance  
617 explained by brain- and endocrine-gene associations is in line with the proportion of tests  
618 carried out in each tissue (46.3% and 16.8%, respectively). Gastrointestinal/digestive genes  
619 explain significantly less variance than we would expect given the large proportion of test  
620 performed (16.01% vs. 32.3%, binomial test,  $p=3.6 \times 10^{-04}$ ), while adipose tissue-genes explain  
621 significantly more variance than we would expect (13.9% vs. 4.6%,  $p=2 \times 10^{-04}$ ). This enrichment  
622 of signal within adipose tissue is of particular interest given the demonstrated overlap between  
623 adiposity and disordered eating patterns<sup>59</sup>, AN risk factors<sup>60-62</sup>, and clinical outcomes<sup>63,64</sup>, as  
624 well as our findings relating AN risk genes to anthropometric traits in the UK Biobank.

625



626 However, these calculations are based on the assumption that all gene-tests are independent;  
627 in fact, we note high correlation of GREX between tissues, including a large number of co-linear  
628 genes and tissues. The number of independent tests carried out is therefore likely to be  
629 substantially lower than the number of tests used in our estimate, perhaps explaining why  
630 gastrointestinal/digestive genes explain less variance than we would expect.

631  
632 Among our gene-tissue associations are a number of genes which may be of particular interest.  
633 For example, decreased expression of *REEP5* in the DLPFC is associated with increased risk of  
634 AN. *REEP5* is a receptor accessory protein which promotes expression of olfactory receptors<sup>65</sup>.  
635 *Reep5*, together with *RTP1* and *RTP2*, is required for cell surface expression of odorants, and is  
636 primarily expressed in olfactory neurons. The DLPFC has a high localized concentration of  
637 olfactory neurons, and DLPFC volume is decreased in anosmic individuals<sup>66</sup>. Olfaction is of  
638 particular interest in eating disorders given its role in taste and desire for food, as well as in a  
639 number of neurological disorders such as Alzheimer's and Parkinson's<sup>67,68</sup>. Individuals with AN  
640 have high rates of reported hyposmia and anosmia<sup>67,69-72</sup>, and perform poorly in odor  
641 discrimination tests, compared to healthy controls. Importantly, odor discrimination ability and  
642 hyposmic status correlates more strongly with BMI than with any specific disordered eating  
643 behavior, even among individuals with AN<sup>73</sup>. Previous studies have also demonstrated  
644 differential expression of olfactory genes following eight restoration in individuals with  
645 Anorexia Nervosa<sup>74</sup>. In line with this, we identified a direct correlation between *REEP5*  
646 expression and body weight in the UK BioBank; each additional unit of gene expression  
647 corresponds to ~140 g additional body weight, and an AN OR of 0.85. Taken together these  
648 results suggest that *REEP5* may have a general role in body size and BMI through altered  
649 olfactory cues, and may be of interest to researchers studying appetite and satiety, as well as  
650 obesity, normal variation in BMI, and AN. *REEP5* has also been implicated in major depressive  
651 disorder and antidepressant response in previous studies<sup>75</sup>.

652 We identified four significantly associated genes within our complex chromosome 12 locus.  
653 Three of these genes (*SUOX*, *RPS26*, *RDH16*) are significantly associated with AN across a range  
654 of gastrointestinal tissues (Figure 1), and have highly correlated expression across almost all

655 non-brain tissues tested. All three of these genes are significantly correlated with  
656 anthropometric traits in the UK BioBank analysis (Figure 2), and all have consistent directions of  
657 effects with our AN prediXcan analysis: that is, the change in expression which increases body  
658 size also decreases AN risk.

659 Little is known about the function of *C12orf49*, the fourth gene in this locus, although SNPs  
660 within the gene have also previously been associated with BMI, waist circumference, and waist-  
661 hip ratio<sup>76</sup>. Taken together, this evidence implies that the locus on chromosome 12 is likely to  
662 be generally associated with BMI and body size, rather than any specific eating disordered  
663 behaviours. The fine-mapping and characterization of this locus supports our hypothesis of a  
664 role for metabolic dysregulation in AN.

665  
666 Increased expression of *CUL3* (Cullin 3) in the caudate basal ganglia was associated with  
667 increased risk of AN in our study (OR=1.07). Dysregulation of *CUL3* is associated with  
668 pseudohypoaldosteronism<sup>77</sup>, a disorder characterized by sodium imbalance in the body and  
669 often presenting with low body weight. Mutations in *CUL3* are associated with schizophrenia<sup>78</sup>,  
670 autism<sup>79</sup> and non-response to anti-depressants<sup>80</sup>. Variants lying near to *CUL3* were identified in  
671 the first GWAS of AN, although these did not reach genome-wide significance<sup>81</sup>.

672  
673 Among our subthreshold gene-tissue associations, we identified a number of genes previously  
674 associated with psychiatric<sup>13,78</sup> and neurological disorders (for example, *FURIN*<sup>13,78,82</sup>,  
675 *ADAMTS9*<sup>83-86</sup>, *MGMT*<sup>86,87</sup>, *SMDT1*<sup>78</sup>, *TMEM108*<sup>88</sup>), as well as with abnormal behavioural  
676 responses in knock-out mice models<sup>38,89-91</sup> (*ADAMTS9*, *CITED4*, *FOXI2*, *FURIN*, *SMDT1*,  
677 *TMEM108*). We also noted a number of genes with prior associations with anthropometric  
678 traits, both in humans (*ADAMTS9*<sup>92,92-96</sup>, *MGMT*<sup>94,97,98</sup>) and in mice<sup>38,89-91</sup> (*CITED4*, *FOXI2*,  
679 *FURIN*, *RDH16*, *SMDT1*, *TMEM108*), as well as genes associated with gastric and esophageal  
680 complaints (*BARX1*<sup>99</sup>) in humans, and abnormal defecation patterns in mice<sup>38,89-91,100</sup> (*RDH16*,  
681 *CITED4*), and with disorders and traits known to be comorbid with AN (*TMEM108*<sup>101-104</sup>).

682

683 Our pathway analysis identified a large number of significantly enriched pathways. In particular,  
684 multiple pathways indicate a role for the post-synaptic density (including PSD95, targets of the  
685 FMRP protein, glutamate receptor genes, among others), which has previously been implicated  
686 in other psychiatric disorders. Four pathways are associated with addiction and addictive  
687 behaviours, including nicotine addiction, alcoholism, cocaine addiction, and amphetamine  
688 addiction. Illicit drug use is significant enriched among individuals with eating disorders, in  
689 particular AN<sup>105</sup>, although this is, to our knowledge, the first study identifying shared genetic  
690 risk factors.

691  
692 Circadian entrainment and clock genes are highly enriched among our data. Longstanding  
693 hypotheses implicated disrupted circadian rhythms in a range of mood disorders, particularly  
694 depression and bipolar disorder<sup>106–108</sup>. Further, behavioural patterns in individuals with AN (for  
695 example excessive exercise<sup>109–111</sup> and lack of sleep) have long provided epidemiological  
696 evidence for circadian rhythm disruption in AN. Circadian rhythms may also have a role in  
697 regulating appetite and satiety pathways<sup>7,112,113</sup>.

698  
699 Our analysis also implicates pathways concerning taste and olfactory transduction, as well as  
700 ghrelin secretion. Ghrelin is an orexigenic hormone with a documented role in appetite and  
701 satiety<sup>114–118</sup> as well as in gut motility<sup>117–119</sup>. Our results suggest that individuals with AN may  
702 have decreased circulating ghrelin levels due to increased genetically regulated expression of  
703 ghrelin inhibitors, and decreased GREX of Ghrelin stimulators. Ghrelin enhances appetite and  
704 increases food intake in humans; lowered baseline circulating ghrelin levels may begin to  
705 explain decreased hunger and desire for food in individuals with AN. Previous studies have  
706 documented dysregulation of ghrelin, leptin and glucagon in individuals with AN<sup>120</sup>. However,  
707 these studies are by definition performed after long periods of starvation or food restriction,  
708 meaning that causation is difficult to disentangle from consequences of eating disordered  
709 behaviours; it is likely that the increased ghrelin levels seen in these studies is a consequence of  
710 long-term fasting, rather than causative. In this study, we assess only genetically regulated gene  
711 expression (GREX), meaning that any associations identified are not affected by diet or

712 environment. Instead, these results may indicate an altered “baseline” level of circulating  
713 ghrelin in individuals with AN.

714 There are a number of limitations that should be taken into account. First, the sample size of  
715 our study is small, especially compared to GWAS sample sizes in other psychiatric  
716 disorders<sup>121,122</sup>. It is likely that increasing sample size substantially will yield many new insights  
717 into the aetiology of anorexia nervosa, and that current sub-threshold associations may lose  
718 significance as sample size increases. Similarly, transcriptomic imputation approaches rely on  
719 large, well-curated reference panels in order to build GREX predictor models; here, we have  
720 used reference panels constructed from GTeX<sup>8,14</sup> and CommonMind Consortium data<sup>10,13</sup>,  
721 including the largest collections of publicly available post-mortem brain tissues. We have shown  
722 previously that there is a significant correlation between the sample sizes used to construct  
723 these predictors and the number of genes included in each predictor database, and that a  
724 number of these databases are therefore likely underpowered<sup>10</sup>.

725  
726 Our analysis highlights the need for greater investigation into the complex aetiology of anorexia  
727 nervosa. Transcriptomic Imputation allows us to identify significant gene-tissue associations  
728 with anorexia nervosa, and indicates an excess of signal in adipose tissue. It is clear from these  
729 results that both psychiatric and metabolic risk factors play a role in AN risk; these factors  
730 should be carefully considered in the design of future studies, as well as in how AN is perceived  
731 and considered by clinicians treating individuals with AN.

732

## 733 References

- 734 1. Bulik, C. M., Slof-Op't Landt, M. C. T., van Furth, E. F. & Sullivan, P. F. The genetics of  
735 anorexia nervosa. *Annu. Rev. Nutr.* **27**, 263–275 (2007).
- 736 2. Duncan, L. *et al.* Significant locus and metabolic genetic correlations revealed in genome-  
737 wide association study of anorexia nervosa. *Am. J. Psychiatry* **174**, 850–858 (2017).
- 738 3. Boraska, V. *et al.* A genome-wide association study of anorexia nervosa. *Mol. Psychiatry*  
739 **19**, (2014).
- 740 4. Huckins, L. M. *et al.* Investigation of common, low-frequency and rare genome-wide  
741 variation in anorexia nervosa. *Mol. Psychiatry* (2017). doi:10.1038/mp.2017.88
- 742 5. Hinney, A. *et al.* Evidence for three genetic loci involved in both anorexia nervosa risk  
743 and variation of body mass index. *Mol. Psychiatry* **22**, (2017).
- 744 6. Avena, N. M. & Bocarsly, M. E. Dysregulation of brain reward systems in eating disorders:  
745 neurochemical information from animal models of binge eating, bulimia nervosa, and  
746 anorexia nervosa. *Neuropharmacology* **63**, 87–96 (2012).
- 747 7. Fabbri, A. D. *et al.* Ghrelin and eating disorders. *Arch. Clin. Psychiatry (São Paulo)* **42**, 52–  
748 62 (2015).
- 749 8. Gamazon, E. R. *et al.* A gene-based association method for mapping traits using  
750 reference transcriptome data. *Nat. Genet.* **47**, 1091–8 (2015).
- 751 9. Gusev, A. *et al.* Integrative approaches for large-scale transcriptome-wide association  
752 studies. *Nat. Genet.* **48**, 245–52 (2016).
- 753 10. Huckins, L. M. *et al.* Gene expression imputation across multiple brain regions reveals  
754 schizophrenia risk throughout development. *bioRxiv* 222596 (2017). doi:10.1101/222596
- 755 11. De Marco, M. C. *et al.* Assessment of the capacity to express informed consent for organ  
756 donation in patients with schizophrenia. *J. Forensic Sci.* **55**, 669–676 (2010).
- 757 12. Laura M. Huckins. Gene expression imputation across multiple brain regions reveals  
758 schizophrenia risk throughout development. *Nat. Genet.*
- 759 13. Fromer, M. *et al.* Gene expression elucidates functional impact of polygenic risk for  
760 schizophrenia. *Nat. Neurosci.* **19**, 1442–1453 (2016).
- 761 14. Ardlie, K. G. *et al.* The Genotype-Tissue Expression (GTEx) pilot analysis: Multitissue gene  
762 regulation in humans. *Science (80-. )*. **348**, 648–660 (2015).
- 763 15. Watson, T. L. & Andersen, A. E. A critical examination of the amenorrhea and weight  
764 criteria for diagnosing anorexia nervosa. *Acta Psychiatr. Scand.* **108**, 175–182 (2003).
- 765 16. Gendall, K. A. *et al.* The psychobiology and diagnostic significance of amenorrhea in  
766 patients with anorexia nervosa. *Fertil. Steril.* **85**, 1531–1535 (2006).
- 767 17. Garfinkel, P. E. *et al.* Should amenorrhoea be necessary for the diagnosis of anorexia  
768 nervosa? Evidence from a Canadian community sample. *Br. J. Psychiatry* **168**, 500–506  
769 (1996).
- 770 18. Willer, C. J., Li, Y. & Abecasis, G. R. METAL: fast and efficient meta-analysis of  
771 genomewide association scans. *Bioinformatics* **26**, 2190–2191 (2010).
- 772 19. Mele, M. *et al.* The human transcriptome across tissues and individuals. *Science (80-. )*.  
773 **348**, 660–665 (2015).
- 774 20. Duncan, L. *et al.* Genome-Wide Association Study Reveals First Locus for Anorexia  
775 Nervosa and Metabolic Correlations. *bioRxiv* (2016).

- 776 21. Yang, J., Lee, S. H., Goddard, M. E. & Visscher, P. M. GCTA: a tool for genome-wide  
777 complex trait analysis. *Am. J. Hum. Genet.* **88**, 76–82 (2011).
- 778 22. Benner, C. *et al.* FINEMAP: Efficient variable selection using summary data from genome-  
779 wide association studies. *Bioinformatics* **32**, 1493–1501 (2016).
- 780 23. Warnes, A. G. R. *et al.* Package ‘gplots’. (2016).
- 781 24. Lab), (Rivas. Global Biobank Engine. *Stanford, CA* (2017). at <<http://gbe.stanford.edu>>
- 782 25. Nealelab. UK\_Biobank\_GWAS. (2017).
- 783 26. BioBank), (UK. UK BioBank search. (2017). at  
784 <<http://biobank.ctsu.ox.ac.uk/crystal/search.cgi>>
- 785 27. Barbeira, A. *et al.* MetaXcan: Summary Statistics Based Gene-Level Association Method  
786 Infers Accurate PrediXcan Results. *bioRxiv* (2016).
- 787 28. de Leeuw, C. A., Mooij, J. M., Heskes, T. & Posthuma, D. MAGMA: generalized gene-set  
788 analysis of GWAS data. *PLoS Comput. Biol.* **11**, e1004219 (2015).
- 789 29. Kirov, G. *et al.* De novo CNV analysis implicates specific abnormalities of postsynaptic  
790 signalling complexes in the pathogenesis of schizophrenia. *Mol. Psychiatry* **17**, 142–53  
791 (2012).
- 792 30. Pardiñas, A. F. *et al.* Common schizophrenia alleles are enriched in mutation-intolerant  
793 genes and maintained by background selection. *bioRxiv* 68593 (2016).  
794 doi:10.1101/068593
- 795 31. Kanehisa, M. *et al.* Data, information, knowledge and principle: back to metabolism in  
796 KEGG. *Nucleic Acids Res.* **42**, D199–205 (2014).
- 797 32. Kanehisa, M. & Goto, S. KEGG: kyoto encyclopedia of genes and genomes. *Nucleic Acids*  
798 *Res.* **28**, 27–30 (2000).
- 799 33. The Gene Ontology Consortium. Gene Ontology Consortium: going forward. *Nucleic Acids*  
800 *Res.* **43**, D1049–1056 (2014).
- 801 34. Croft, D. *et al.* The Reactome pathway knowledgebase. *Nucleic Acids Res.* **42**, D472–7  
802 (2014).
- 803 35. Thomas, P. D. *et al.* PANTHER: a library of protein families and subfamilies indexed by  
804 function. *Genome Res.* **13**, 2129–2141 (2003).
- 805 36. Mi, H., Muruganujan, A. & Thomas, P. D. PANTHER in 2013: modeling the evolution of  
806 gene function, and other gene attributes, in the context of phylogenetic trees. *Nucleic*  
807 *Acids Res.* **41**, D377–86 (2013).
- 808 37. BioCarta. MSigDB Collections. (2017).
- 809 38. MGI-About the Mouse Genome Informatics database resource. at  
810 <<http://www.informatics.jax.org/mgihome/projects/aboutmgi.shtml>>
- 811 39. (GTEx Consortium). GTEx Portal. (2015). at  
812 <<http://gtexportal.org/home/documentationPage>>
- 813 40. Barbeira, A. N. *et al.* Exploring the phenotypic consequences of tissue specific gene  
814 expression variation inferred from GWAS summary statistics. *Nat. Commun.* **In Press**,  
815 (2018).
- 816 41. Darnell, J. C. *et al.* FMRP stalls ribosomal translocation on mRNAs linked to synaptic  
817 function and autism. *Cell* **146**, 247–61 (2011).
- 818 42. Ascano, M. *et al.* FMRP targets distinct mRNA sequence elements to regulate protein  
819 expression. *Nature* **492**, 382–6 (2012).

- 820 43. Callan, M. A. & Zarnescu, D. C. Heads-up: new roles for the fragile X mental retardation  
821 protein in neural stem and progenitor cells. *Genesis* **49**, 424–40 (2011).
- 822 44. Fromer, M. *et al.* De novo mutations in schizophrenia implicate synaptic networks.  
823 *Nature* **506**, 179–184 (2014).
- 824 45. Iossifov, I. *et al.* De novo gene disruptions in children on the autistic spectrum. *Neuron*  
825 **74**, 285–99 (2012).
- 826 46. Lee, H. J. *et al.* KLF4 positively regulates human ghrelin expression. *Biochem. J.* **420**, 403–  
827 411 (2009).
- 828 47. Murtuza, M. I. & Isokawa, M. Endogenous ghrelin-O-acyltransferase (GOAT) acylates  
829 local ghrelin in the hippocampus. *J. Neurochem.* (2017). doi:10.1111/jnc.14244
- 830 48. Chen, V. P., Gao, Y., Geng, L. & Brimijoin, S. Butyrylcholinesterase regulates central  
831 ghrelin signaling and has an impact on food intake and glucose homeostasis. *Int. J. Obes.*  
832 **41**, 1413–1419 (2017).
- 833 49. Broglio, F. *et al.* Acetylcholine Regulates Ghrelin Secretion in Humans. *J. Clin. Endocrinol.*  
834 *Metab.* **89**, 2429–2433 (2004).
- 835 50. Kirov, G. *et al.* De novo CNV analysis implicates specific abnormalities of postsynaptic  
836 signalling complexes in the pathogenesis of schizophrenia. *Mol. Psychiatry* **17**, 142–53  
837 (2012).
- 838 51. Huckins, L. *et al.* Transcriptomic Imputation of Bipolar Disorder and Bipolar subtypes  
839 reveals 29 novel associated genes. *bioRxiv* 222786 (2017). doi:10.1101/222786
- 840 52. Naleid, A. M., Grace, M. K., Cummings, D. E. & Levine, A. S. Ghrelin induces feeding in the  
841 mesolimbic reward pathway between the ventral tegmental area and the nucleus  
842 accumbens. *Peptides* **26**, 2274–2279 (2005).
- 843 53. Brunetti, L. *et al.* Effects of ghrelin and amylin on dopamine, norepinephrine and  
844 serotonin release in the hypothalamus. *Eur. J. Pharmacol.* **454**, 189–192 (2002).
- 845 54. Piggott, L. A., Bauman, A. L., Scott, J. D. & Dessauer, C. W. The A-kinase anchoring protein  
846 Yotiao binds and regulates adenylyl cyclase in brain. (2008).
- 847 55. Lin, J. W. *et al.* Yotiao , a Novel Protein of Neuromuscular Junction and Brain That  
848 Interacts with Specific Splice Variants of NMDA Receptor Subunit NR1. **18**, 2017–2027  
849 (2017).
- 850 56. Wu, Q., Clark, M. S. & Palmiter, R. D. Deciphering a neuronal circuit that mediates  
851 appetite. *Nature* **483**, 594–597 (2012).
- 852 57. Chen, L. T., Gilman, A. G. & Kozasa, T. A Candidate Target for G Protein Action in Brain \*.  
853 **274**, 26931–26938 (1999).
- 854 58. Ness, V. *et al.* Variations in the GRIN2B gene are associated with risky decision-making.  
855 *Neuropharmacology* **61**, 950–956 (2011).
- 856 59. Reed, Z. E., Micali, N., Bulik, C. M., Smith, G. D. & Wade, K. H. Assessing the causal role of  
857 adiposity on disordered eating in childhood, adolescence, and adulthood: A Mendelian  
858 randomization analysis. *Am. J. Clin. Nutr.* **106**, 764–772 (2017).
- 859 60. Barker, E. T. & Galambos, N. L. Body Dissatisfaction of Adolescent Girls and Boys: *J. Early*  
860 *Adolesc.* **23**, 141–165 (2003).
- 861 61. Rosenblum, G. D. & Lewis, M. The relations among body image, physical attractiveness,  
862 and body mass in adolescence. *Child Dev.* **70**, 50–64
- 863 62. Presnell, K., Bearman, S. K. & Stice, E. Risk factors for body dissatisfaction in adolescent

- 864 boys and girls: A prospective study. *Int. J. Eat. Disord.* **36**, 389–401 (2004).
- 865 63. Bodell, L. P. & Mayer, L. E. S. Percent body fat is a risk factor for relapse in anorexia  
866 nervosa: a replication study. *Int. J. Eat. Disord.* **44**, 118–23 (2011).
- 867 64. El Ghoch, M., Calugi, S., Chignola, E., Bazzani, P. V & Dalle Grave, R. Body mass index,  
868 body fat and risk factor of relapse in anorexia nervosa. *Eur. J. Clin. Nutr.* **70**, 194–198  
869 (2016).
- 870 65. Saito, H., Kubota, M., Roberts, R. W., Chi, Q. & Matsunami, H. RTP Family Members  
871 Induce Functional Expression of Mammalian Odorant Receptors. *Cell* **119**, 679–691  
872 (2004).
- 873 66. Bitter, T. *et al.* Anosmia Leads to a Loss of Gray Matter in Cortical Brain Areas. *Chem.*  
874 *Senses* **35**, 407–415 (2010).
- 875 67. Valdes-Socin, H. *et al.* Reproduction, smell, and neurodevelopmental disorders: genetic  
876 defects in different hypogonadotropic hypogonadal syndromes. *Front. Endocrinol.*  
877 *(Lausanne)*. **5**, 109 (2014).
- 878 68. Martin, G. N. *The Neuropsychology of Smell and Taste*. (Taylor & Francis, 2013).
- 879 69. Schecklmann, M. *et al.* Olfaction in child and adolescent anorexia nervosa. *J. Neural*  
880 *Transm.* **119**, 721–728 (2012).
- 881 70. Roessner, V., Bleich, S., Banaschewski, T. & Rothenberger, A. Olfactory deficits in  
882 anorexia nervosa. *Eur. Arch. Psychiatry Clin. Neurosci.* **255**, 6–9 (2005).
- 883 71. Rapps, N. *et al.* Olfactory deficits in patients with anorexia nervosa. *Eur. Eat. Disord. Rev.*  
884 **18**, 385–9 (2010).
- 885 72. Dazzi, F., Nitto, S. De, Zambetti, G., Loriedo, C. & Ciofalo, A. Alterations of the olfactory-  
886 gustatory functions in patients with eating disorders. *Eur. Eat. Disord. Rev.* **21**, 382–385  
887 (2013).
- 888 73. Rapps, N. *et al.* Olfactory deficits in patients with anorexia nervosa. *Eur. Eat. Disord. Rev.*  
889 **18**, 385–389 (2010).
- 890 74. Kim, Y. *et al.* Assessment of gene expression in peripheral blood using RNAseq before  
891 and after weight restoration in anorexia nervosa. *Psychiatry Res.* **210**, 287–293 (2013).
- 892 75. Yang, Z. *et al.* Association of APC and REEP5 gene polymorphisms with major depression  
893 disorder and treatment response to antidepressants in a Han Chinese population. *Gen.*  
894 *Hosp. Psychiatry* **34**, 571–577 (2012).
- 895 76. Fox, C. S. *et al.* Genome-wide association to body mass index and waist circumference:  
896 the Framingham Heart Study 100K project. *BMC Med. Genet.* **8 Suppl 1**, S18 (2007).
- 897 77. Osawa, M. *et al.* CUL3 gene analysis enables early intervention for pediatric  
898 pseudohypoaldosteronism type II in infancy. *Pediatr. Nephrol.* **28**, 1881–1884 (2013).
- 899 78. Ripke, S. *et al.* Biological insights from 108 schizophrenia-associated genetic loci. *Nature*  
900 **511**, 421–427 (2014).
- 901 79. Firth, H. V & Wright, C. F. The Deciphering Developmental Disorders (DDD) study. *Dev.*  
902 *Med. Child Neurol.* **53**, 702–703 (2011).
- 903 80. Li, Q. S., Tian, C., Seabrook, G. R., Drevets, W. C. & Narayan, V. A. Analysis of 23andMe  
904 antidepressant efficacy survey data: implication of circadian rhythm and neuroplasticity  
905 in bupropion response. *Transl. Psychiatry* **6**, e889 (2016).
- 906 81. Boraska, V. *et al.* A genome-wide association study of anorexia nervosa. *Mol. Psychiatry*  
907 (2014). doi:10.1038/mp.2013.187



- 908 82. Spada, J. *et al.* Genome-wide association analysis of actigraphic sleep phenotypes in the  
909 LIFE Adult Study. *J. Sleep Res.* **25**, 690–701 (2016).
- 910 83. Kamboh, M. I. *et al.* Genome-wide association analysis of age-at-onset in Alzheimer’s  
911 disease. *Mol. Psychiatry* **17**, 1340–6 (2012).
- 912 84. Sprooten, E. *et al.* White matter integrity as an intermediate phenotype: exploratory  
913 genome-wide association analysis in individuals at high risk of bipolar disorder.  
914 *Psychiatry Res.* **206**, 223–31 (2013).
- 915 85. Seshadri, S. *et al.* Genetic correlates of brain aging on MRI and cognitive test measures: a  
916 genome-wide association and linkage analysis in the Framingham Study. *BMC Med.*  
917 *Genet.* **8 Suppl 1**, S15 (2007).
- 918 86. Li, H. *et al.* Candidate single-nucleotide polymorphisms from a genomewide association  
919 study of Alzheimer disease. *Arch. Neurol.* **65**, 45–53 (2008).
- 920 87. Jun, G. *et al.* A novel Alzheimer disease locus located near the gene encoding tau protein.  
921 *Mol. Psychiatry* **21**, 108–17 (2016).
- 922 88. Pankratz, N. *et al.* Copy number variation in familial Parkinson disease. *PLoS One* **6**,  
923 e20988 (2011).
- 924 89. About KOMP | IMPC.
- 925 90. Ayadi, A. *et al.* Mouse large-scale phenotyping initiatives: overview of the European  
926 Mouse Disease Clinic (EUMODIC) and of the Wellcome Trust Sanger Institute Mouse  
927 Genetics Project. *Mamm. Genome* **23**, 600–610 (2012).
- 928 91. van der Weyden, L., White, J. K., Adams, D. J. & Logan, D. W. The mouse genetics toolkit:  
929 revealing function and mechanism. *Genome Biol.* **12**, 224 (2011).
- 930 92. Heid, I. M. *et al.* Meta-analysis identifies 13 new loci associated with waist-hip ratio and  
931 reveals sexual dimorphism in the genetic basis of fat distribution. *Nat. Genet.* **42**, 949–60  
932 (2010).
- 933 93. Randall, J. C. *et al.* Sex-stratified genome-wide association studies including 270,000  
934 individuals show sexual dimorphism in genetic loci for anthropometric traits. *PLoS Genet.*  
935 **9**, e1003500 (2013).
- 936 94. Kathiresan, S. *et al.* A genome-wide association study for blood lipid phenotypes in the  
937 Framingham Heart Study. *BMC Med. Genet.* **8 Suppl 1**, S17 (2007).
- 938 95. Shungin, D. *et al.* New genetic loci link adipose and insulin biology to body fat  
939 distribution. *Nature* **518**, 187–196 (2015).
- 940 96. Fox, C. S. *et al.* Genome-wide association for abdominal subcutaneous and visceral  
941 adipose reveals a novel locus for visceral fat in women. *PLoS Genet.* **8**, e1002695 (2012).
- 942 97. Velez Edwards, D. R. *et al.* Gene-environment interactions and obesity traits among  
943 postmenopausal African-American and Hispanic women in the Women’s Health Initiative  
944 SHARe Study. *Hum. Genet.* **132**, 323–36 (2013).
- 945 98. Bonder, M. J. *et al.* The effect of host genetics on the gut microbiome. *Nat. Genet.* **48**,  
946 1407–1412 (2016).
- 947 99. Levine, D. M. *et al.* A genome-wide association study identifies new susceptibility loci for  
948 esophageal adenocarcinoma and Barrett’s esophagus. *Nat. Genet.* **45**, 1487–93 (2013).
- 949 100. Keane, T. M. *et al.* Mouse genomic variation and its effect on phenotypes and gene  
950 regulation. *Nature* **477**, 289–294 (2011).
- 951 101. Meigs, J. B. *et al.* Genome-wide association with diabetes-related traits in the

- 952 Framingham Heart Study. *BMC Med. Genet.* **8 Suppl 1**, S16 (2007).
- 953 102. Scott, L. J. *et al.* A genome-wide association study of type 2 diabetes in Finns detects  
954 multiple susceptibility variants. *Science* **316**, 1341–5 (2007).
- 955 103. Elks, C. E. *et al.* Thirty new loci for age at menarche identified by a meta-analysis of  
956 genome-wide association studies. *Nat. Genet.* **42**, 1077–85 (2010).
- 957 104. Pickrell, J. K. *et al.* Detection and interpretation of shared genetic influences on 42  
958 human traits. *Nat. Genet.* **48**, 709–17 (2016).
- 959 105. Root, T. L. *et al.* Patterns of co-morbidity of eating disorders and substance use in  
960 Swedish females. *Psychol. Med.* **40**, 105–15 (2010).
- 961 106. Murray, G., Allen, N. B. & Trinder, J. Mood and the circadian system: investigation of a  
962 circadian component in positive affect. *Chronobiol. Int.* **19**, 1151–69 (2002).
- 963 107. Bellivier, F., Geoffroy, P.-A., Etain, B. & Scott, J. Sleep- and circadian rhythm-associated  
964 pathways as therapeutic targets in bipolar disorder. *Expert Opin. Ther. Targets* **19**, 747–  
965 763 (2015).
- 966 108. Murray, G. *et al.* Nature’s clocks and human mood: The circadian system modulates  
967 reward motivation. *Emotion* **9**, 705–716 (2009).
- 968 109. Davis, C. *et al.* The Prevalence of High-Level Exercise in the Eating Disorders: Etiological  
969 Implications.
- 970 110. Anorexia nervosa with excessive exercise: A phenotype with close links to obsessive-  
971 compulsive disorder. *Psychiatry Res.* **142**, 209–217 (2006).
- 972 111. The prevalence of high-level exercise in the eating disorders: Etiological implications.  
973 *Compr. Psychiatry* **38**, 321–326 (1997).
- 974 112. Herpertz, S. *et al.* Longitudinal changes of circadian leptin, insulin and cortisol plasma  
975 levels and their correlation during refeeding in patients with anorexia nervosa. *Eur. J.*  
976 *Endocrinol.* **142**, 373–9 (2000).
- 977 113. Arble, D. M., Bass, J., Laposky, A. D., Vitaterna, M. H. & Turek, F. W. Circadian timing of  
978 food intake contributes to weight gain. *Obesity* **17**, 2100–2102 (2009).
- 979 114. Zhang, L., Yagi, M. & Herzog, H. The role of NPY and ghrelin in anorexia nervosa. *Curr.*  
980 *Pharm. Des.* **18**, 4766–4778 (2012).
- 981 115. Helder, S. G. & Collier, D. A. The genetics of eating disorders. *Curr. Top. Behav. Neurosci.*  
982 **6**, 157–175 (2011).
- 983 116. Kojima, M. & Kangawa, K. Ghrelin: structure and function. *Physiol. Rev.* **85**, 495–522  
984 (2005).
- 985 117. Dailey, M. J. & Moran, T. H. Glucagon-like peptide 1 and appetite. *Trends Endocrinol.*  
986 *Metab.* **24**, 85–91 (2013).
- 987 118. Holst, J. J. The physiology of glucagon-like peptide 1. *Physiol. Rev.* **87**, 1409–1439 (2007).
- 988 119. Hellström, P. M. *et al.* GLP-1 suppresses gastrointestinal motility and inhibits the  
989 migrating motor complex in healthy subjects and patients with irritable bowel syndrome.  
990 *Neurogastroenterol. Motil.* **20**, 649–659 (2008).
- 991 120. Atalayer, D., Gibson, C., Konopacka, A. & Geliebter, A. Ghrelin and eating disorders. *Prog.*  
992 *Neuropsychopharmacol. Biol. Psychiatry* **40**, 70–82 (2013).
- 993 121. Sullivan, P. F. The psychiatric GWAS consortium: big science comes to psychiatry. *Neuron*  
994 **68**, 182–186 (2010).
- 995 122. Sullivan, P. F., Daly, M. J. & O’Donovan, M. Genetic architectures of psychiatric disorders:

996 the emerging picture and its implications. *Nat. Rev. Genet.* **13**, 537–51 (2012).  
997  
998

999 **This manuscript is dedicated to the memory of Professor Pamela Sklar.**

1000

1001 **Acknowledgements**

1002 Data were generated as part of the CommonMind Consortium supported by funding from  
1003 Takeda Pharmaceuticals Company Limited, F. Hoffman-La Roche Ltd and NIH grants  
1004 R01MH085542, R01MH093725, P50MH066392, P50MH080405, R01MH097276, RO1-MH-  
1005 075916, P50M096891, P50MH084053S1, R37MH057881 and R37MH057881S1,  
1006 HHSN271201300031C, AG02219, AG05138 and MH06692.

1007

1008 Brain tissue for the study was obtained from the following brain bank collections: the Mount  
1009 Sinai NIH Brain and Tissue Repository, the University of Pennsylvania Alzheimer's Disease Core  
1010 Center, the University of Pittsburgh NeuroBioBank and Brain and Tissue Repositories and the  
1011 NIMH Human Brain Collection Core. CMC Leadership: Pamela Sklar, Joseph Buxbaum (Icahn  
1012 School of Medicine at Mount Sinai), Bernie Devlin, David Lewis (University of Pittsburgh),  
1013 Raquel Gur, Chang-Gyu Hahn (University of Pennsylvania), Keisuke Hirai, Hiroyoshi Toyoshiba  
1014 (Takeda Pharmaceuticals Company Limited), Enrico Domenici, Laurent Essioux (F. Hoffman-La  
1015 Roche Ltd), Lara Mangravite, Mette Peters (Sage Bionetworks), Thomas Lehner, Barbara Lipska  
1016 (NIMH).

1017

1018 The Genotype-Tissue Expression (GTEx) Project was supported by the [Common Fund](#) of the  
1019 Office of the Director of the National Institutes of Health, and by NCI, NHGRI, NHLBI, NIDA,  
1020 NIMH, and NINDS. The data used for the analyses described in this manuscript were obtained  
1021 from the [GTEx Portal](#) on 09/05/16. BrainSpan: Atlas of the Developing Human Brain [Internet].  
1022 Funded by ARRA Awards 1RC2MH089921-01, 1RC2MH090047-01, and 1RC2MH089929-01.

1023

1024 UK BioBank analyses were carried out using results obtained from the Neale and Rivas Labs.  
1025 Results were downloaded from the Global Biobank Engine (Global Biobank Engine, Stanford, CA  
1026 (URL: <http://gbe.stanford.edu>) [September 30<sup>th</sup>, 2017]. The authors would like to thank the  
1027 Rivas lab for making the resource available.

1028

1029 **Acknowledgements for the Eating Disorders Working Group of the Psychiatric**  
1030 **Genomics Consortium (PGC-ED)**

1031 The Wellcome Trust Wellcome Trust WT088827/Z/09; WT098051;

1032

1033 Swedish Research Council (VR Dnr: 538-2013-8864);

1034

1035 We thank the Price Foundation for their support of recruiting patients, collecting clinical  
1036 information and providing DNA samples used in this study. We also thank the Klarman  
1037 Family Foundation for supporting the study. We thank the technical staff at the Center for  
1038 Applied Genomics (CAG) at CHOP for generating genotypes used for analyses and the  
1039 nursing, medical assistant and medical staff for their invaluable assistance with sample  
1040 collection. Yiran Guo was funded by the 2011-2014 Davis Foundation Postdoctoral  
1041 Fellowship Program in Eating Disorders Research Award. Dong Li was funded by the 2012-  
1042 2015 Davis Foundation Postdoctoral Fellowship Program in Eating Disorders Research  
1043 Award. Genome-wide genotyping for CHOP samples was funded by an Institutional  
1044 Development Fund to CAG from CHOP. The study was additionally funded through the  
1045 Electronic Medical Records and Genomics (eMERGE) Network (U01 HG006830) by National  
1046 Human Genome Research Institute of National Institutes of Health, and also funded by  
1047 donation from the Kurbert Family;

1048

1049 National Institutes of Health: K01MH093750; K01MH106675; K01MH109782;  
1050 K02AA018755-06, R01AA015416-08, 5U01MH094432-04, 3U01MH094432-03S1; R01  
1051 MH109528; D0886501; R01 MH092793;

1052

1053 This work received grants from EC Framework V Factors in Healthy Eating, from  
1054 INRA/INSERM (4M406D), and from PHRC ENDANO (2008-A01636-49);

1055 European Commission (2008-2011) as an Early Stage Researcher from the Research  
1056 Training Network INTACT (Individually Tailored Stepped Care for Women with Eating  
1057 Disorders) in the Marie Curie Program (MRTN-CT-2006-035988);  
1058  
1059 Gerome Breen acknowledges support from the National Institute for Health Research (NIHR)  
1060 Biomedical Research Centre at South London and Maudsley NHS Foundation Trust and  
1061 King's College London. The views expressed are those of the authors and not necessarily  
1062 those of the NHS, the NIHR, or the Department of Health.  
1063  
1064 Veneto Region Grant BIOVEDA; Contract grant number: DGR 3984/08;  
1065  
1066 Academy of Finland (28327, 286028); (Dr. Raevuori, grant number 259764);  
1067  
1068 The German Ministry for Education and Research (National Genome Research Net-Plus  
1069 01GS0820 and 01KU0903), the German Research Foundation (DFG; HI865/2-1), the  
1070 European Community's Seventh Framework Programme (FP7/2007-2013) under grant  
1071 agreement no. 245009 and no.262055." We thank the German Ministry for Education and  
1072 Research for funding the ANTOP-study (project number 01GV0624)  
1073 AS was supported by the Federal Ministry of Education and Research (BMBF), Germany, FKZ  
1074 01EO1502; German Federal Ministry for Education and Research (BMBF) 01GV0601 and  
1075 01GV0624; German Ministry for Education and Research (National Genome Research Net-  
1076 Plus 01GS0820) and the German Research Foundation (DFG; HI865/2-1); MHT received  
1077 grant support from the Alexander von Humboldt Foundation, the Helmholtz Alliance  
1078 ICEMED-Imaging and Curing Environmental Metabolic Diseases, through the Initiative and  
1079 Networking Fund of the Helmholtz Association, the Helmholtz cross-program topic  
1080 "Metabolic Dysfunction," and the Deutsche Forschungsgemeinschaft (DFG-TS226/1-1 and  
1081 TS226/3-1) and the European Research Council Consolidator Grant (HepatpMetaboPath)"

1082 Ministry for Research and Education, Germany; The Helmholtz Alliance ICEMED-Imaging  
1083 and Curing Environmental Metabolic Diseases, through the Initiative and Networking Fund of  
1084 the Helmholtz Association, the Helmholtz cross-program topic "Metabolic Dysfunction," and  
1085 the Deutsche Forschungsgemeinschaft (DFG-TS226/1-1 and TS226/3-1); This work was  
1086 supported by the Deutsche Forschungsgemeinschaft (EH 367/5-1 and SFB 940) and the  
1087 Swiss Anorexia Nervosa Foundation;

1088  
1089 Andrew Bergen is supported by a Professional Services Agreement with the Regents of the  
1090 University of California; Resnick Family Chair in Eating Disorders; Klarman Family  
1091 Foundation;

1092  
1093 Research Council of Norway (RCN), and South-East Norway Regional Health Authority  
1094 (SEN); Bergen Research Foundation, NFR (NORMENT-SFF), NCNG: This sample collection  
1095 was supported by grants from the Bergen Research Foundation and the University of  
1096 Bergen, the Dr Einar Martens Fund, the K.G. Jebsen Foundation, the Research Council of  
1097 Norway, to SLH, VMS and TE; Supported by the Research Council of Norway (#248778, #  
1098 223273); The twin program of research at the Norwegian Institute of Public Health was  
1099 supported by grants from The Norwegian Research Council and The Norwegian Foundation  
1100 for Health and Rehabilitation;

1101  
1102 China Scholarship Council (Shuyang Yao);

1103  
1104 Genome Canada, the government of Ontario, the Canadian Institutes of Health Research,  
1105 University of Toronto McLaughlin Centre; Ontario Mental Health Foundation for funding the  
1106 recruitment and collection of the DNA samples. Ministry of Health of Ontario AFP Innovation  
1107 Fund;

1108

1109 Grants 324715 and 480420 from the National Health and Medical Research Council  
1110 (NHMRC) to TDW supported this work. Administrative support for data collection was  
1111 received from the Australian Twin Registry, which is supported by an Enabling Grant (ID  
1112 310667) from the NHMRC administered by the University of Melbourne;  
1113 Matthew Flinders Fellowship, Flinders University, South Australia, Australia  
1114  
1115 Internal Grant Agency of the Ministry of Health of the Czech Republic IGA MZ \_R NT 14094-  
1116 3/2013;  
1117  
1118 Research of Korea Centers for Disease Control and Prevention Fund (code# HD16A1351);  
1119  
1120 Nicole Soranzo's research is supported by the Wellcome Trust (Grant Codes WT098051 and  
1121 WT091310), the EU FP7 (EPIGENESYS Grant Code 257082 and BLUEPRINT Grant  
1122 Code+HEALTH-F5-2011-282510) and the National Institute for Health Research Blood and  
1123 Transplant Research Unit (NIHR BTRU) in Donor Health and Genomics at the University of  
1124 Cambridge in partnership with NHS Blood and Transplant (NHSBT). The views expressed are  
1125 those of the author(s) and not necessarily those of the NHS, the NIHR, the Department of  
1126 Health or NHSBT.  
1127  
1128 Psychiatry Research Trust (registered charity no. 284286);  
1129  
1130 Spanish Ministry of Economy and Competitiveness (MINECO) no. SAF2013-49108-R, the  
1131 Generalitat de Catalunya AGAUR 2014 SGR-1138, the European Commission 7th Framework  
1132 Program (FP7/2007-2013) 262055 (ESGI); Instituto de Salud Carlos III (FIS PI14/290 and  
1133 CIBERobn  
1134  
1135 Supported by MH CZ - DRO (MMCI, 00209805);



1136  
1137 An unrestricted grant from the Lundbeck Foundation, iPSYCH (Initiative for Integrative  
1138 Psychiatric Research); and by Aarhus University for CIRRAU (Centre of Integrated Register-  
1139 Based Research);  
1140  
1141 This research was supported by a ZonMW VIDI Grant (91786327) from The Netherlands  
1142 Organization for Scientific Research (NWO) to Prof. dr. Martien Kas;  
1143  
1144 This study was supported by EU H2020 grants 692145, 676550, 654248, Estonian Research  
1145 Council Grant IUT20-60, NIASC, EIT ñ Health and NIH-BMI Grant No: 2R01DK075787-06A1  
1146 and EU through the European Regional Development Fund (Project No. 2014-2020.4.01.15-  
1147 0012 GENTRANSMED);  
1148  
1149 Ulrike Schmidt receives salary report from the National Institute of Health Research Mental  
1150 Health Biomedical Research Centre at South London and Maudsley National Health Service  
1151 Foundation Trust and King's College London.

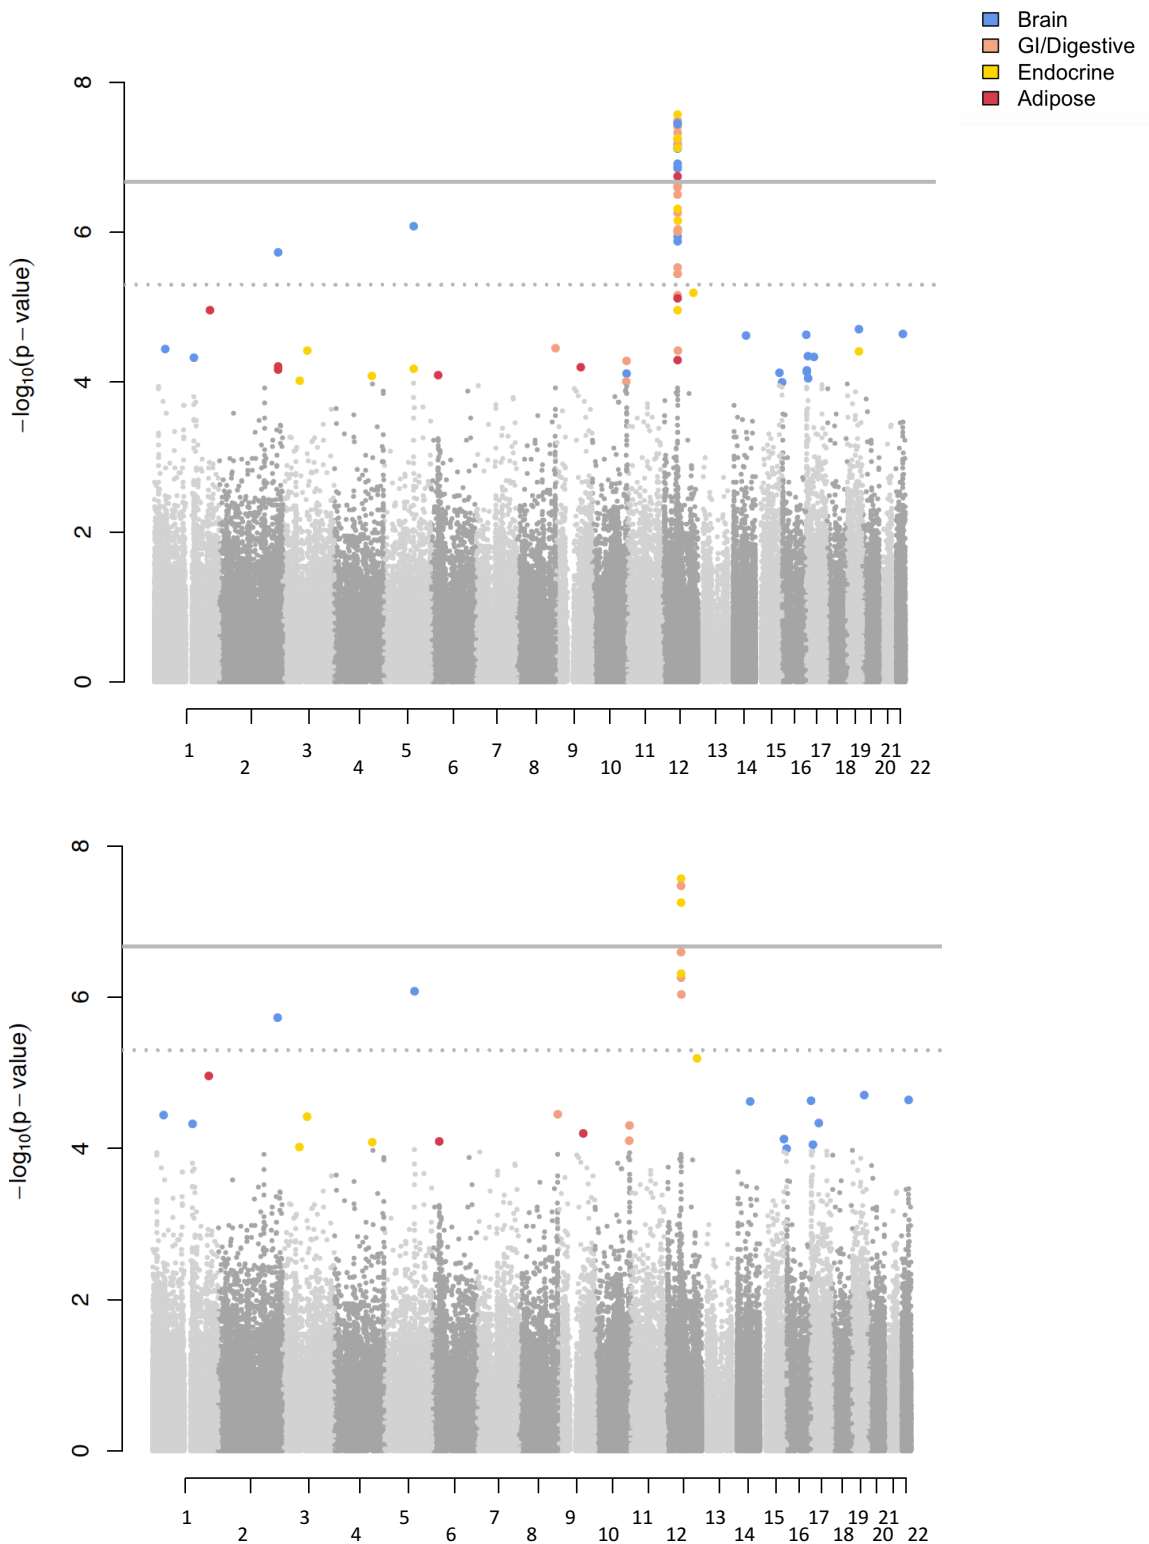

Figure 1: Genic associations in Anorexia Nervosa

A) We identify 37 significant gene-tissue associations across brain, GI/digestive, endocrine, and adipose tissues

B) 14 gene-tissue associations remain significant after applying CoCo and FINEMAP.

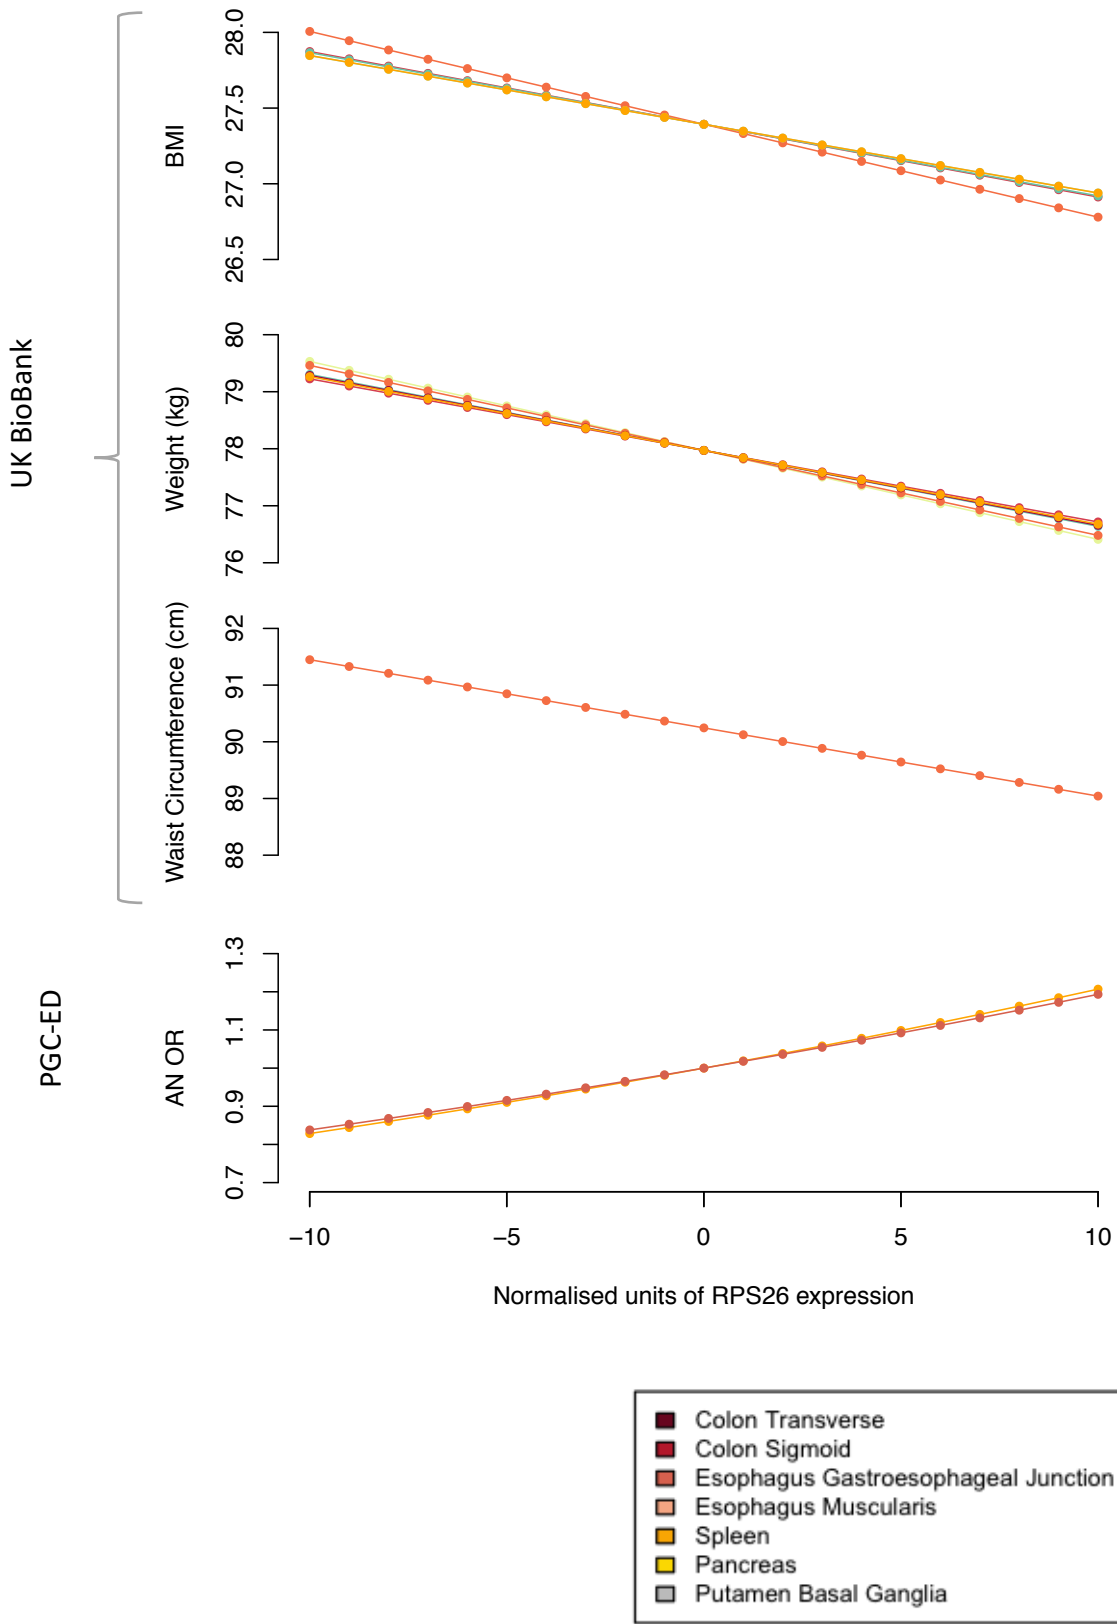

Figure 2A: Genetically regulated expression of *RPS26* is significantly associated with BMI, weight and waist circumference in the UK BioBank, and with AN in PGC-ED

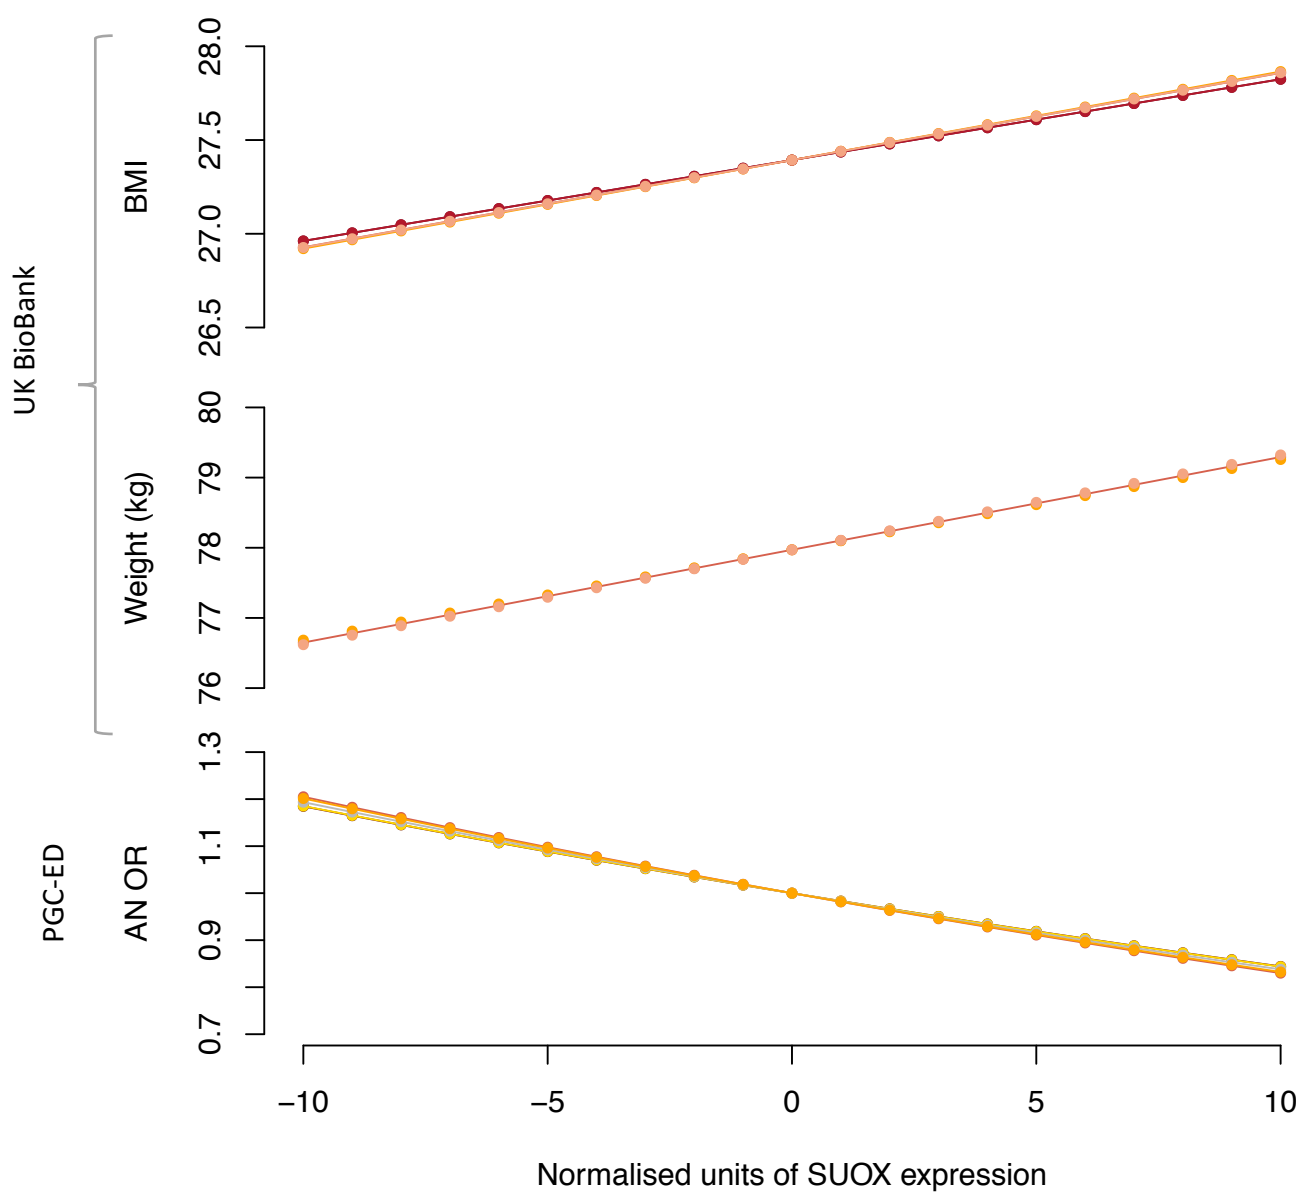

Figure 2B: Genetically regulated expression of *SUOX* is significantly associated with BMI and weight in the UK BioBank, and with AN in PGC-ED

| Tissue                              | Source | Ngenes | P-val threshold |
|-------------------------------------|--------|--------|-----------------|
| Adipose Subcutaneous                | GTEX   | 10861  | 4.60E-06        |
| Adrenal Gland                       | GTEX   | 9222   | 5.42E-06        |
| Anterior Cingulate Cortex BA24      | GTEX   | 8717   | 5.74E-06        |
| Caudate Basal Ganglia               | GTEX   | 9113   | 5.49E-06        |
| Cerebellar Hemisphere               | GTEX   | 9441   | 5.30E-06        |
| Cerebellum                          | GTEX   | 9983   | 5.01E-06        |
| Colon Sigmoid                       | GTEX   | 9323   | 5.36E-06        |
| Colon Transverse                    | GTEX   | 9464   | 5.28E-06        |
| Cortex                              | GTEX   | 9132   | 5.48E-06        |
| DLPFC                               | CMC    | 9571   | 5.22E-06        |
| Esophagus Gastroesophageal Junction | GTEX   | 9306   | 5.37E-06        |
| Esophagus Mucosa                    | GTEX   | 10700  | 4.67E-06        |
| Esophagus Muscularis                | GTEX   | 10336  | 4.84E-06        |
| Frontal Cortex BA9                  | GTEX   | 9009   | 5.55E-06        |
| Hippocampus                         | GTEX   | 8510   | 5.88E-06        |
| Hypothalamus                        | GTEX   | 8555   | 5.84E-06        |
| Liver                               | GTEX   | 8528   | 5.86E-06        |
| Nucleus Accumbens Basal Ganglia     | GTEX   | 8887   | 5.63E-06        |
| Pancreas                            | GTEX   | 9732   | 5.14E-06        |
| Pituitary                           | GTEX   | 9138   | 5.47E-06        |
| Putamen Basal Ganglia               | GTEX   | 8728   | 5.73E-06        |
| Small Intestine Terminal Ileum      | GTEX   | 8838   | 5.66E-06        |
| Spleen                              | GTEX   | 9324   | 5.36E-06        |
| Stomach                             | GTEX   | 9352   | 5.35E-06        |
| Thyroid                             | GTEX   | 11126  | 4.49E-06        |
|                                     |        | 234896 | 2.13E-07        |

| gene       | gene name | tissue         | beta   | se     | p        | dirs         |
|------------|-----------|----------------|--------|--------|----------|--------------|
| ENSG000001 | CITED4    | Putamen Bas    | 0.021  | 0.0051 | 3.63E-05 | +++++-----+  |
| ENSG000001 | LYSMD1    | Cerebellar Hc  | -0.068 | 0.0166 | 4.78E-05 | +++-----     |
| ENSG000001 | VASH2     | Adipose Sub    | -0.152 | 0.0345 | 1.10E-05 | ---+---+---  |
| ENSG000000 | CUL3      | Caudate Bas:   | 0.072  | 0.0151 | 1.86E-06 | +-----+      |
| ENSG000001 | ADAMTS9   | Adrenal Glan   | 0.078  | 0.02   | 9.56E-05 | +++---+---   |
| ENSG000001 | ARL13B    | Pancreas       | 0.382  | 0.0929 | 3.84E-05 | +++---+---   |
| ENSG000001 | INPP4B    | Pancreas       | -0.160 | 0.0407 | 8.30E-05 | -----+---    |
| ENSG000001 | REEP5     | DLPFC          | -0.160 | 0.0325 | 8.34E-07 | -----+---    |
| ENSG000001 | TRIM38    | Adipose Sub    | 0.091  | 0.0231 | 8.05E-05 | +++++---+--- |
| ENSG000001 | FBXL6     | Liver          | -0.133 | 0.0323 | 3.58E-05 | +++---+---   |
| ENSG000001 | BARX1     | Adipose Subc   | 0.085  | 0.0211 | 6.38E-05 | +++---+---   |
| ENSG000001 | FOXI2     | Colon Transv   | -0.650 | 0.1667 | 9.73E-05 | ---+---+---  |
| ENSG000001 | MGMT      | Small Intestir | -0.031 | 0.0076 | 5.22E-05 | -----+---    |
| ENSG000001 | RPS26     | Spleen         | 0.120  | 0.0215 | 2.70E-08 | +++++---+--- |
| ENSG000001 | SUOX      | Esophagus G.   | -0.059 | 0.0107 | 3.41E-08 | -----+---    |
| ENSG000001 | SUOX      | Spleen         | -0.053 | 0.0098 | 5.61E-08 | -----+---    |
| ENSG000001 | SUOX      | Putamen Bas    | -0.077 | 0.0147 | 1.42E-07 | -----+---    |
| ENSG000001 | RPS26     | Esophagus G.   | 0.141  | 0.0274 | 2.54E-07 | +++++---+--- |
| ENSG000001 | SUOX      | Pancreas       | -0.035 | 0.007  | 4.95E-07 | -----+---    |
| ENSG000001 | SUOX      | Colon Transv   | -0.059 | 0.0117 | 5.47E-07 | -----+---    |
| ENSG000001 | RDH16     | Small Intestir | 0.098  | 0.0199 | 9.09E-07 | +++---+---   |
| ENSG000001 | C12orf49  | Thyroid        | 0.352  | 0.0779 | 6.49E-06 | +++---+---   |
| ENSG000001 | FURIN     | Putamen Bas    | 0.114  | 0.0287 | 7.64E-05 | +++---+---   |
| ENSG000000 | CTNS      | Hippocampu:    | 0.028  | 0.0071 | 6.90E-05 | +++-----     |
| ENSG000000 | NTN1      | Nucleus Accu   | 0.395  | 0.1008 | 8.88E-05 | +++---+---   |
| ENSG000001 | TMEM108   | Cortex         | 0.602  | 0.1475 | 4.47E-05 | +++---+---   |
| ENSG000001 | YWHAE     | Hypothalamu    | 0.050  | 0.0119 | 2.37E-05 | +++++---+--- |
| ENSG000000 | ZNF207    | Anterior Cing  | -0.026 | 0.0063 | 4.55E-05 | -----+---    |
| ENSG000002 | ZNF225    | Spleen         | 0.104  | 0.0252 | 3.92E-05 | +++++---+--- |
| ENSG000001 | ZNF235    | Frontal Corte  | 0.433  | 0.1014 | 1.96E-05 | +++---+---   |
| ENSG000001 | SMDT1     | Cerebellar Hc  | 0.018  | 0.0043 | 2.29E-05 | +++-----     |

| chr | pos1      | pos2      |
|-----|-----------|-----------|
| 1   | 41326729  | 41328018  |
| 1   | 151132224 | 151138424 |
| 1   | 213123862 | 213165379 |
| 2   | 225334867 | 225450110 |
| 3   | 64501333  | 64673676  |
| 3   | 93698983  | 93774512  |
| 4   | 142944313 | 143768585 |
| 5   | 112212084 | 112258236 |
| 6   | 25963030  | 25987384  |
| 8   | 145579091 | 145583036 |
| 9   | 96713905  | 96717654  |
| 10  | 129535499 | 129539450 |
| 10  | 131265448 | 131566271 |
| 12  | 56435637  | 56438116  |
| 12  | 56390964  | 56400425  |
| 12  | 56390964  | 56400425  |
| 12  | 56390964  | 56400425  |
| 12  | 56435637  | 56438116  |
| 12  | 56390964  | 56400425  |
| 12  | 56390964  | 56400425  |
| 12  | 57345219  | 57353158  |
| 12  | 117153593 | 117175875 |
| 15  | 91411822  | 91426688  |
| 17  | 3539762   | 3564836   |
| 17  | 8924859   | 9147317   |
| 17  | 8076555   | 8079717   |
| 17  | 1247566   | 1303672   |
| 17  | 30677136  | 30708905  |
| 19  | 44616334  | 44637027  |
| 19  | 44732882  | 44809199  |
| 22  | 42475695  | 42480288  |





|        |                   |
|--------|-------------------|
| Weight | ENSG000001 RDH16  |
| Weight | ENSG000001 REEP5  |
| Weight | ENSG000001 REEP5  |
| Weight | ENSG000001 REEP5  |
| Weight | ENSG000001 REEP5  |
| Weight | ENSG000001 REEP5  |
| Weight | ENSG000001 RPS26  |
| Weight | ENSG000001 RPS26  |
| Weight | ENSG000001 RPS26  |
| Weight | ENSG000001 RPS26  |
| Weight | ENSG000001 RPS26  |
| Weight | ENSG000001 RPS26  |
| Weight | ENSG000001 RPS26  |
| Weight | ENSG000001 RPS26  |
| Weight | ENSG000001 SUOX   |
| Weight | ENSG000001 SUOX   |
| Weight | ENSG000001 SUOX   |
| Weight | ENSG000001 SUOX   |
| Weight | ENSG000001 SUOX   |
| Weight | ENSG000001 SUOX   |
| Weight | ENSG000001 SUOX   |
| Weight | ENSG000001 TRIM38 |
| Weight | ENSG000001 TRIM38 |

| Tissue                              | Z          | Beta       | P        |
|-------------------------------------|------------|------------|----------|
| Colon-Transverse                    | -7.7773617 | -0.0738614 | 7.41E-15 |
| Artery-Coronary                     | -7.375406  | -0.0468271 | 1.64E-13 |
| SmallIntestine-Terminallleum        | -6.4889742 | -0.0593701 | 8.64E-11 |
| Heart-AtrialAppendage               | -7.5878365 | -0.0824355 | 3.25E-14 |
| Breast-MammaryTissue                | -6.3491046 | -0.0346515 | 2.17E-10 |
| Skin-SunExposed-Lowerleg            | -6.2404842 | -0.0575258 | 4.36E-10 |
| Cells-EBV-transformedlymphocytes    | -6.0618266 | -0.0634271 | 1.35E-09 |
| Adipose-Subcutaneous                | -5.9677586 | -0.0508896 | 2.41E-09 |
| DLPFC                               | -5.8095616 | -0.0229857 | 6.26E-09 |
| Liver                               | -5.6989127 | -0.0674398 | 1.21E-08 |
| Lung                                | -5.626001  | -0.0401266 | 1.84E-08 |
| Spleen                              | -5.58502   | -0.058693  | 2.34E-08 |
| Skin-NotSunExposed-Suprapubic       | 5.85012331 | 0.02616247 | 4.91E-09 |
| Spleen                              | 5.84007447 | 0.02813843 | 5.22E-09 |
| Esophagus-Muscularis                | 5.74811528 | 0.03123837 | 9.02E-09 |
| Esophagus-GastroesophagealJunction  | 5.74185611 | 0.03005111 | 9.36E-09 |
| Cells-EBV-transformedlymphocytes    | 5.43805266 | 0.0320962  | 5.39E-08 |
| Skin-SunExposed-Lowerleg            | 5.31919323 | 0.02376405 | 1.04E-07 |
| Colon-Sigmoid                       | 5.3137019  | 0.04097991 | 1.07E-07 |
| Ovary                               | 5.29633119 | 0.0319386  | 1.18E-07 |
| Colon-Transverse                    | 5.28102353 | 0.03099286 | 1.28E-07 |
| Thyroid                             | 5.2735135  | 0.02241977 | 1.34E-07 |
| Pancreas                            | 5.21840847 | 0.03451622 | 1.80E-07 |
| Colon-Transverse                    | -5.6792371 | -0.0484106 | 1.35E-08 |
| Artery-Coronary                     | -5.2353944 | -0.0297862 | 1.65E-07 |
| Heart-AtrialAppendage               | -5.9156355 | -0.0575675 | 3.31E-09 |
| Stomach                             | 6.03116147 | 0.01516222 | 1.63E-09 |
| Adipose-Subcutaneous                | 5.8432158  | 0.01219944 | 5.12E-09 |
| Heart-LeftVentricle                 | 5.75450038 | 0.01803554 | 8.69E-09 |
| Liver                               | 5.618464   | 0.02565575 | 1.93E-08 |
| Thyroid                             | 5.5459707  | 0.01493591 | 2.92E-08 |
| Esophagus-Mucosa                    | 5.48046854 | 0.0136585  | 4.24E-08 |
| Testis                              | 5.41629516 | 0.01918677 | 6.08E-08 |
| Colon-Transverse                    | 5.40371016 | 0.01607542 | 6.53E-08 |
| Esophagus-Muscularis                | 5.31591259 | 0.01452058 | 1.06E-07 |
| Brain-Nucleusaccumbens-basalganglia | 5.31093287 | 0.02756249 | 1.09E-07 |
| WholeBlood                          | 5.28285769 | 0.01756255 | 1.27E-07 |
| Nerve-Tibial                        | 5.27563136 | 0.01348915 | 1.32E-07 |
| Brain-Anteriorcingulatecortex-BA24  | 5.26659324 | 0.0193856  | 1.39E-07 |
| Skin-SunExposed-Lowerleg            | 5.24941963 | 0.01402023 | 1.53E-07 |
| AdrenalGland                        | 5.20926148 | 0.01385548 | 1.90E-07 |

|                                    |            |            |          |
|------------------------------------|------------|------------|----------|
| SmallIntestine-Terminallleum       | -5.8900719 | -0.0474498 | 3.86E-09 |
| Artery-Tibial                      | 6.11566191 | 0.03833574 | 9.62E-10 |
| WholeBlood                         | 5.73480599 | 0.08610324 | 9.76E-09 |
| Skin-NotSunExposed-Suprapubic      | 5.63609068 | 0.03540437 | 1.74E-08 |
| Esophagus-Mucosa                   | 5.63078519 | 0.04224336 | 1.79E-08 |
| Testis                             | 5.52861547 | 0.0502847  | 3.23E-08 |
| Breast-MammaryTissue               | -6.530904  | -0.0315872 | 6.54E-11 |
| Skin-SunExposed-Lowerleg           | -6.2850329 | -0.0513608 | 3.28E-10 |
| Heart-AtrialAppendage              | -6.2593475 | -0.0602814 | 3.87E-10 |
| DLPFC                              | -5.5731241 | -0.019474  | 2.50E-08 |
| Liver                              | -5.4913367 | -0.0573873 | 3.99E-08 |
| Spleen                             | -5.4182093 | -0.0502923 | 6.02E-08 |
| Cells-EBV-transformedlymphocytes   | -5.4039068 | -0.0498926 | 6.52E-08 |
| Adipose-Subcutaneous               | -5.2552273 | -0.0399848 | 1.48E-07 |
| Brain-Anteriorcingulatecortex-BA24 | 6.41507712 | 0.04309815 | 1.41E-10 |
| Skin-NotSunExposed-Suprapubic      | 6.03928432 | 0.02410321 | 1.55E-09 |
| Cells-EBV-transformedlymphocytes   | 5.9137031  | 0.03136303 | 3.35E-09 |
| Heart-LeftVentricle                | 5.80708153 | 0.04596199 | 6.36E-09 |
| Esophagus-Muscularis               | 5.68045296 | 0.02726121 | 1.34E-08 |
| Esophagus-GastroesophagealJunction | 5.55841118 | 0.02569696 | 2.72E-08 |
| Spleen                             | 5.42427892 | 0.02307607 | 5.82E-08 |
| Thyroid                            | 7.79117755 | 0.02939098 | 6.64E-15 |
| Pancreas                           | 7.34532675 | 0.0430497  | 2.05E-13 |



| SET                                                         | NGENES | COMP P     | FDR        |           |
|-------------------------------------------------------------|--------|------------|------------|-----------|
| ANABOLIC STEROIDS                                           | 34     | 0.0011139  | 0.08075775 |           |
| PROGESTOGENS                                                | 44     | 0.00089785 | 0.08075775 |           |
| Polycystic ovary syndrome                                   | 14     | 2.84E-05   | 0.0040274  |           |
| Schizophrenia, schizoaffective disorder or bipolar disorder | 33     | 0.00027732 | 0.01968972 |           |
| LDL cholesterol                                             | 116    | 0.00052673 | 0.02493189 |           |
| Hemoglobin                                                  | 35     | 0.0013392  | 0.03803328 |           |
| Sex hormone-binding globulin levels                         | 26     | 0.0012608  | 0.03803328 |           |
| Fasting glucose-related traits                              | 31     | 0.0052364  | 0.05724238 |           |
| Fibrinogen                                                  | 35     | 0.0050973  | 0.05724238 |           |
| Hematocrit                                                  | 35     | 0.0030755  | 0.05724238 |           |
| Hematology traits                                           | 33     | 0.0052405  | 0.05724238 |           |
| Mean corpuscular volume                                     | 56     | 0.0036234  | 0.05724238 |           |
| Non-albumin protein levels                                  | 12     | 0.0044993  | 0.05724238 |           |
| Protein C levels                                            | 13     | 0.004335   | 0.05724238 |           |
| Schizophrenia or bipolar disorder                           | 26     | 0.0044133  | 0.05724238 |           |
| Iron status biomarkers                                      | 24     | 0.0057116  | 0.05793194 |           |
| Cardiovascular disease risk factors                         | 35     | 0.0074585  | 0.07060713 |           |
| Mean corpuscular hemoglobin                                 | 59     | 0.010082   | 0.08947775 |           |
| Cav2::modulators & sma...                                   | 20     | 6.75E-05   | 0.01012985 |           |
| Axon guidance                                               | 119    | 0.00010663 | 0.01012985 |           |
| MID                                                         | 10409  | 0.00020205 | 0.0127965  |           |
| HIGH                                                        | 2715   | 0.00056599 | 0.0253175  |           |
| Wnt signaling pathway                                       | 134    | 0.00099255 | 0.0253175  |           |
| Prion diseases                                              | 33     | 0.0010036  | 0.0253175  |           |
| Cav2::ion channels tra...                                   | 43     | 0.0010086  | 0.0253175  |           |
|                                                             | 701224 | 16         | 0.001066   | 0.0253175 |
| Circadian entrainment                                       | 94     | 0.0012742  | 0.02689978 |           |
| Cav2::ion channels tra...                                   | 36     | 0.0020532  | 0.0390108  |           |
| Huntington's disease                                        | 163    | 0.0027021  | 0.04620483 |           |
| ARC+NMDAR+PSD95+mGluR5                                      | 122    | 0.0029182  | 0.04620483 |           |
| FMRP-targets                                                | 735    | 0.0032083  | 0.04689054 |           |
| MAPK signaling pathway                                      | 239    | 0.004037   | 0.05478786 |           |
| Gap junction                                                | 86     | 0.0062529  | 0.07862759 |           |
| Nucleus                                                     | 127    | 0.0068123  | 0.07862759 |           |
| Alzheimer's disease                                         | 148    | 0.0070351  | 0.07862759 |           |

## ANALYSIS

Brain Region Drug targets

Brain Region Drug targets

Brain Region GWAS gene sets

Brain Region Hypothesis Driven







| GENE SET                               | NGENES |
|----------------------------------------|--------|
| ANTIEPILEPTICS                         | 221    |
| OTHER DERMATOLOGICAL PREPARATIONS      | 204    |
| Mean corpuscular volume                | 56     |
| Polycystic ovary syndrome              | 14     |
| Sex hormone-binding globulin levels    | 26     |
| Mean corpuscular hemoglobin            | 59     |
| Lipid metabolism phenotypes            | 35     |
| Dehydroepiandrosterone sulphate levels | 29     |
| LDL cholesterol                        | 116    |
| Calcium levels                         | 17     |
| Hematology traits                      | 33     |
| Circadian entrainment                  | 94     |
| Cav2::modulators & sma...              | 20     |
| HIGH                                   | 2714   |
| Long-term potentiation                 | 62     |
| Gap junction                           | 86     |
| Nicotine addiction                     | 35     |
| FMRP-targets                           | 735    |
| Alcoholism                             | 151    |
| Retrograde endocannabi...              | 94     |
| Pre post synaptic genes                | 429    |
| Glutamatergic synapse                  | 108    |
| Neuroactive ligand-rec...              | 286    |
| Ionotropic Glutamate R...              | 14     |
| GABAergic synapse                      | 80     |
| Cocaine addiction                      | 46     |
| Porphyrin and chloroph...              | 36     |
| Amphetamine addiction                  | 64     |
| Synaptic vesicle                       | 309    |
| Taste transduction                     | 48     |
| All Ion Channels                       | 220    |
| Glutamate Receptor Genes               | 21     |
| ARC                                    | 24     |
| Cav2::ion channels tra...              | 43     |
| Pre-synapse                            | 387    |
| Neurotransmitter recep...              | 69     |
| Cav2::ion channels tra...              | 36     |
| CLOCK-CONTROLLED WEAK                  | 399    |
| Nucleus                                | 127    |

|                                                                   |     |
|-------------------------------------------------------------------|-----|
| GABA Receptor Genes                                               | 17  |
| ASD                                                               | 65  |
| Amyotrophic lateral sc...                                         | 49  |
| Olfactory transduction                                            | 292 |
| Cholinergic synapse                                               | 109 |
| Morphine addiction                                                | 85  |
| MAPK signaling pathway                                            | 238 |
| <br>                                                              |     |
| KEGG CIRCADIAN ENTRAINMENT                                        | 94  |
| positive regulation of cAMP metabolic process                     | 59  |
| KEGG LONG-TERM POTENTIATION                                       | 66  |
| positive regulation of cAMP biosynthetic process                  | 58  |
| positive regulation of cyclic nucleotide metabolic process        | 69  |
| interstitial matrix                                               | 15  |
| positive regulation of cyclic nucleotide biosynthetic process     | 65  |
| positive regulation of nucleotide biosynthetic process            | 67  |
| positive regulation of nucleotide metabolic process               | 72  |
| positive regulation of purine nucleotide biosynthetic process     | 67  |
| positive regulation of purine nucleotide metabolic process        | 71  |
| protein palmitoylation                                            | 13  |
| ear development                                                   | 184 |
| inner ear morphogenesis                                           | 91  |
| ear morphogenesis                                                 | 112 |
| retinoid X receptor binding                                       | 13  |
| CREB phosphorylation through the activation of CaMKII             | 14  |
| Neuronal System                                                   | 269 |
| abnormal brain white matter morphology                            | 118 |
| KEGG VASCULAR SMOOTH MUSCLE CONTRACTION                           | 116 |
| KEGG GAP JUNCTION                                                 | 86  |
| regulation of cAMP metabolic process                              | 96  |
| inner ear development                                             | 157 |
| Unblocking of NMDA receptor glutamate binding and activation      | 15  |
| Muscarinic acetylcholine receptor 2 and 4 signaling pathway       | 51  |
| regulation of cAMP biosynthetic process                           | 88  |
| KEGG PANCREATIC SECRETION                                         | 90  |
| Ras activation upon Ca <sup>2+</sup> influx through NMDA receptor | 16  |
| morphogenesis of embryonic epithelium                             | 127 |
| abnormal embryonic tissue morphology                              | 638 |
| Metabotropic glutamate receptor group I pathway                   | 22  |
| 5HT1 type receptor mediated signaling pathway                     | 39  |
| abnormal optic nerve morphology                                   | 63  |
| regulation of oxidoreductase activity                             | 61  |

|                                                                            |     |
|----------------------------------------------------------------------------|-----|
| CREB phosphorylation through the activation of Ras                         | 24  |
| thin cerebellar molecular layer                                            | 16  |
| KEGG NICOTINE ADDICTION                                                    | 35  |
| increased circulating aspartate transaminase level                         | 33  |
| KEGG NEUROACTIVE LIGAND-RECEPTOR INTERACTION                               | 246 |
| magnesium ion transmembrane transporter activity                           | 11  |
| magnesium ion transport                                                    | 13  |
| abnormal cranial nerve morphology                                          | 142 |
| Metabotropic glutamate receptor group III pathway                          | 59  |
| abnormal chemoreceptor morphology                                          | 19  |
| Activation of NMDA receptor upon glutamate binding and postsynaptic events | 33  |
| GPCR downstream signaling                                                  | 648 |
| Pausing and recovery of Tat-mediated HIV elongation                        | 26  |
| Tat-mediated HIV elongation arrest and recovery                            | 26  |
| KEGG GLUTAMATERGIC SYNAPSE                                                 | 110 |
| Post NMDA receptor activation events                                       | 30  |

| SELF P   | COMP P     | FDR        |
|----------|------------|------------|
|          | 1          | 0.00054783 |
|          | 1          | 0.03971768 |
|          | 1          | 0.00038437 |
|          | 1          | 0.03971768 |
| 0.75095  | 0.00011617 | 0.00818999 |
| 1.83E-05 | 9.77E-05   | 0.00818999 |
| 0.022136 | 0.00047961 | 0.02254167 |
| 0.92453  | 0.00090675 | 0.03196294 |
| 0.99103  | 0.0018655  | 0.0526071  |
| 0.98229  | 0.0034203  | 0.06889461 |
| 1        | 0.0030833  | 0.06889461 |
| 0.99597  | 0.0048546  | 0.08556233 |
| 0.31855  | 0.0056112  | 0.0879088  |
| 0.99713  | 1.39E-06   | 0.00026328 |
| 5.07E-05 | 1.46E-05   | 0.00137913 |
| 1        | 4.67E-05   | 0.00242511 |
| 0.99998  | 5.13E-05   | 0.00242511 |
| 0.99999  | 8.62E-05   | 0.00325662 |
| 0.99996  | 0.00034877 | 0.01098626 |
| 1        | 0.00058824 | 0.01588248 |
| 1        | 0.00071347 | 0.01685573 |
| 1        | 0.0014176  | 0.02860257 |
| 1        | 0.0015625  | 0.02860257 |
| 1        | 0.0016647  | 0.02860257 |
| 1        | 0.0019511  | 0.03072983 |
| 0.99898  | 0.0021656  | 0.03148449 |
| 1        | 0.0024029  | 0.03243915 |
| 1        | 0.0031707  | 0.03895763 |
| 0.94846  | 0.003298   | 0.03895763 |
| 1        | 0.0045245  | 0.04857897 |
| 1        | 0.0046422  | 0.04857897 |
| 1        | 0.0048836  | 0.04857897 |
| 1        | 0.005179   | 0.04894155 |
| 0.99999  | 0.0063647  | 0.05688814 |
| 0.85231  | 0.0066219  | 0.05688814 |
| 0.99986  | 0.0073367  | 0.06028853 |
| 1        | 0.0077512  | 0.0610407  |
| 1        | 0.0089817  | 0.06790165 |
| 0.99929  | 0.0093868  | 0.06823482 |
| 1        | 0.010253   | 0.07015275 |
| 1        | 0.010393   | 0.07015275 |

|         |            |            |
|---------|------------|------------|
| 0.89702 | 0.011027   | 0.07186562 |
| 1       | 0.011959   | 0.0753417  |
| 1       | 0.014531   | 0.08859223 |
| 1       | 0.01544    | 0.09060545 |
| 1       | 0.01582    | 0.09060545 |
| 1       | 0.016661   | 0.09261556 |
| 1       | 0.018149   | 0.0980046  |
| 0.99713 | 1.39E-06   | 0.00906001 |
| 0.98723 | 2.12E-06   | 0.00906001 |
| 0.99988 | 4.44E-06   | 0.0094967  |
| 0.99384 | 3.77E-06   | 0.0094967  |
| 0.99983 | 8.43E-06   | 0.01201703 |
| 1       | 7.57E-06   | 0.01201703 |
| 0.99976 | 9.98E-06   | 0.01218925 |
| 0.99995 | 1.72E-05   | 0.0143912  |
| 0.99998 | 1.68E-05   | 0.0143912  |
| 0.99995 | 1.72E-05   | 0.0143912  |
| 0.99998 | 1.85E-05   | 0.0143912  |
| 0.47858 | 2.13E-05   | 0.01517981 |
| 1       | 2.31E-05   | 0.01521966 |
| 1       | 3.34E-05   | 0.02037954 |
| 1       | 3.94E-05   | 0.0224352  |
| 0.88099 | 4.92E-05   | 0.02626988 |
| 0.66681 | 5.25E-05   | 0.02640441 |
| 1       | 5.68E-05   | 0.02695815 |
| 1       | 6.50E-05   | 0.02926935 |
| 1       | 8.80E-05   | 0.03584404 |
| 0.99999 | 8.62E-05   | 0.03584404 |
| 1       | 9.30E-05   | 0.03616223 |
| 1       | 0.00012491 | 0.04449919 |
| 0.85806 | 0.00012411 | 0.04449919 |
| 0.88138 | 0.00013926 | 0.04762692 |
| 1       | 0.00015287 | 0.05027071 |
| 0.99999 | 0.00020155 | 0.06382417 |
| 0.95278 | 0.00021    | 0.064125   |
| 1       | 0.00026817 | 0.07225017 |
| 1       | 0.00027041 | 0.07225017 |
| 0.94933 | 0.00025314 | 0.07225017 |
| 0.99204 | 0.00026744 | 0.07225017 |
| 1       | 0.00028995 | 0.07279226 |
| 0.99946 | 0.00029798 | 0.07279226 |

|           |            |            |
|-----------|------------|------------|
| 0.99576   | 0.00029221 | 0.07279226 |
| 0.99955   | 0.00030681 | 0.07286738 |
| 0.99996   | 0.00034877 | 0.0804555  |
| 0.86126   | 0.00035758 | 0.0804555  |
| 1         | 0.00039331 | 0.08186923 |
| 0.97551   | 0.00041174 | 0.08186923 |
| 0.9824    | 0.00039927 | 0.08186923 |
| 1         | 0.00037751 | 0.08186923 |
| 0.99994   | 0.00040289 | 0.08186923 |
| 0.0082276 | 0.00048983 | 0.09157941 |
| 0.99972   | 0.00047394 | 0.09157941 |
| 1         | 0.00049294 | 0.09157941 |
| 0.25191   | 0.00051413 | 0.09157941 |
| 0.25191   | 0.00051413 | 0.09157941 |
| 1         | 0.00056017 | 0.09684585 |
| 0.99967   | 0.00056635 | 0.09684585 |

| SYSTEM                                  | SOURCE       |
|-----------------------------------------|--------------|
| Gastro-Intestinal and Peripheral Tissue | Drug targets |
| Gastro-Intestinal and Peripheral Tissue | GWAS gene s  |
| Gastro-Intestinal and Peripheral Tissue | Hypothesis D |
| Gastro-Intestinal and Peripheral Tissue | Agnostic     |
| Gastro-Intestinal and Peripheral Tissue | Agnostic     |
| Gastro-Intestinal and Peripheral Tissue | Agnostic     |

| SET                                                         | NGENES | SELF P  | COMP P     |
|-------------------------------------------------------------|--------|---------|------------|
| ANABOLIC STEROIDS                                           | 34     | 0.56804 | 0.00026816 |
| Schizophrenia, schizoaffective disorder or bipolar disorder | 32     | 0.66707 | 0.00029124 |
| CLOCK-CONTROLLED PERVA...                                   | 121    | 1       | 0.00032294 |
| hyaluronic acid binding                                     | 20     | 0.95248 | 2.32E-08   |
| KEGG PATHWAYS IN CANCER                                     | 310    | 1       | 1.87E-05   |
| abnormal nervous system development                         | 736    | 1       | 1.55E-05   |



FDR

0.0388832

0.04135608

0.06103566

0.00019827

0.05352215

0.05352215
